# Supplementary material for: Intraspecific and spatial variation in habitat use by sperm whales (Physeter macrocephalus) along the west coast of Martinique
Source: PeerJ. 2025 Jul 14;13:e19614. doi: 10.7717/peerj.19614 (PMC12269786; doi:10.7717/peerj.19614)
Supplement: Supplemental Information 11 [file peerj-13-19614-s011.xlsx]

## Sheet: IPI
Audio_file	Nb_id	Ind	Annotation	Samples	IPI.ms	Mean_IPI	Sd_IPI	Sum_Sd_IPI	AS.m	Group_sex
20240112_3	4	a	1		5.927	5.8643	0.000393129	0.0118488	13.1133	M
20240112_3	4	a	2		5.802		0.000388129
20240112_3	4	a	3		6.05		0.00344845
20240112_3	4	a	4		5.927		0.000393129
20240112_3	4	a	5		5.802		0.000388129
20240112_3	4	a	6		5.708		0.00244297
20240112_3	4	a	7		5.927		0.000393129
20240112_3	4	a	8		5.677		0.00350813
20240112_3	4	a	9		5.927		0.000393129
20240112_3	4	a	10		5.896		0.000100489
20240112_3	4	b	1		3.458	3.2342	0.00500864	0.033907	9.52183	FJ
20240112_3	4	b	2		3.458		0.00500864
20240112_3	4	b	3		3.021		0.00454542
20240112_3	4	b	4		3.083		0.00228614
20240112_3	4	b	5		2.969		0.0070331
20240112_3	4	b	6		3.333		0.000976144
20240112_3	4	b	7		3.458		0.00500864
20240112_3	4	b	8		3.333		0.000976144
20240112_3	4	b	9		3.083		0.00228614
20240112_3	4	b	10		3.146		0.000777924
20240112_3	4	c	1		1.979	2.0272	0.000232324	1.52606	7.77441	I
20240112_3	4	c	2		1.979		2.1904e-05
20240112_3	4	c	3		2.042		0.00367872
20240112_3	4	c	4		2.219		0.0012144
20240112_3	4	c	5		1.917		1.52091
20240112_3	4	d	1	569	5.92708	7.75	0.332303	2.65333	15.4855	M
20240112_3	4	d	2	593	6.17708		0.247407
20240112_3	4	d	3	569	5.92708		0.332303
20240112_3	4	d	4	593	6.17708		0.247407
20240112_3	4	d	5	593	6.17708		0.247407
20240112_3	4	d	6	522	5.4375		0.534766
20240112_3	4	d	7	569	5.92708		0.332303
20240112_3	4	d	8	557	5.80208		0.379438
20240112_4	3	a	1	495	5.15625	5.28356	0.00162091	0.00981921	12.3827	M
20240112_4	3	a	2	515	5.36458		0.0006564
20240112_4	3	a	3	495	5.15625		0.00162091
20240112_4	3	a	4	505	5.26042		5.35837e-05
20240112_4	3	a	5	505	5.26042		5.35837e-05
20240112_4	3	a	6	495	5.15625		0.00162091
20240112_4	3	a	7	505	5.26042		5.35837e-05
20240112_4	3	a	8	505	5.26042		5.35837e-05
20240112_4	3	a	9	515	5.36458		0.0006564
20240112_4	3	a	10	525	5.46875		0.00342936
20240112_4	3	b	1	515	5.36458	5.51562	0.00228136	0.021837	12.6747	M
20240112_4	3	b	2	536	5.58333		0.000458442
20240112_4	3	b	3	556	5.79167		0.0076199
20240112_4	3	b	4	515	5.36458		0.00228136
20240112_4	3	b	5	525	5.46875		0.000219727
20240112_4	3	b	6	531	5.53125		2.44141e-05
20240112_4	3	b	7	515	5.36458		0.00228136
20240112_4	3	b	8	541	5.63542		0.001435
20240112_4	3	b	9	546	5.6875		0.0029541
20240112_4	3	b	10	515	5.36458		0.00228136
20240112_4	3	c	1	247	2.57292	2.44687	0.00158865	0.0171322	8.38232	I
20240112_4	3	c	2	242	2.52083		0.000546984
20240112_4	3	c	3	216	2.52083		0.000546984
20240112_4	3	c	4	216	2.25		0.00387598
20240112_4	3	c	5	227	2.25		0.00387598
20240112_4	3	c	6	258	2.36458		0.000677192
20240112_4	3	c	7	232	2.6875		0.00579004
20240112_4	3	c	8	237	2.41667		9.12543e-05
20240112_4	3	c	9	232	2.46875		4.78516e-05
20240112_4	3	c	10	247	2.41667		9.12543e-05
20240112_6	4	a	1		5.417	5.4001	2.8561e-05	0.0272451	12.5293	M
20240112_6	4	a	2		5.094		0.00936972
20240112_6	4	a	3		5.417		2.8561e-05
20240112_6	4	a	4		5.417		2.8561e-05
20240112_6	4	a	5		5.417		2.8561e-05
20240112_6	4	a	6		5.26		0.0019628
20240112_6	4	a	7		5.729		0.0108175
20240112_6	4	a	8		5.26		0.0019628
20240112_6	4	a	9		5.417		2.8561e-05
20240112_6	4	a	10		5.573		0.00298944
20240112_6	4	b	1		3.5	3.5583	0.000339889	0.0373152	9.99055	FJ
20240112_6	4	b	2		3.823		0.00700661
20240112_6	4	b	3		3.26		0.00889829
20240112_6	4	b	4		3.823		0.00700661
20240112_6	4	b	5		3.5		0.000339889
20240112_6	4	b	6		3.427		0.00172397
20240112_6	4	b	7		3.344		0.00459245
20240112_6	4	b	8		3.5		0.000339889
20240112_6	4	b	9		3.823		0.00700661
20240112_6	4	b	10		3.583		6.1009e-05
20240112_6	4	c	1		5.26	5.43657	0.00311775	0.0617668	12.5752	M
20240112_6	4	c	2		5.33		0.00113575
20240112_6	4	c	3		5.33		0.00113575
20240112_6	4	c	4		5.729		0.00855145
20240112_6	4	c	5		4.938		0.0248573
20240112_6	4	c	6		5.896		0.0211075
20240112_6	4	c	7		5.573		0.00186128
20240112_6	4	d	1	359	3.73958	3.42292	0.0100278	0.0367231	9.79478	FJ
20240112_6	4	d	2	336	3.5		0.000594184
20240112_6	4	d	3	336	3.5		0.000594184
20240112_6	4	d	4	313	3.26042		0.00264063
20240112_6	4	d	5	298	3.10417		0.0101602
20240112_6	4	d	6	352	3.66667		0.00594141
20240112_6	4	d	7	306	3.1875		0.0055421
20240112_6	4	d	8	336	3.5		0.000594184
20240112_6	4	d	9	329	3.42708		1.73611e-06
20240112_6	4	d	10	321	3.34375		0.000626736
20240112_7	5	a	1	725	7.55208	7.65521	0.00106348	0.0182172	15.3663	M
20240112_7	5	a	2	737	7.67708		4.78516e-05
20240112_7	5	a	3	725	7.55208		0.00106348
20240112_7	5	a	4	737	7.67708		4.78516e-05
20240112_7	5	a	5	731	7.61458		0.000165039
20240112_7	5	a	6	748	7.79167		0.00186209
20240112_7	5	a	7	759	7.90625		0.00630219
20240112_7	5	a	8	748	7.79167		0.00186209
20240112_7	5	a	9	714	7.4375		0.00473969
20240112_7	5	a	10	725	7.55208		0.00106348
20240112_7	5	b	1	521	5.42708	5.54792	0.00146007	0.0114844	12.7153	M
20240112_7	5	b	2	521	5.42708		0.00146007
20240112_7	5	b	3	533	5.55208		1.73611e-06
20240112_7	5	b	4	544	5.66667		0.00141016
20240112_7	5	b	5	521	5.42708		0.00146007
20240112_7	5	b	6	544	5.66667		0.00141016
20240112_7	5	b	7	544	5.66667		0.00141016
20240112_7	5	b	8	544	5.66667		0.00141016
20240112_7	5	b	9	521	5.42708		0.00146007
20240112_7	5	b	10	533	5.55208		1.73611e-06
20240112_7	5	c	1	465	4.84375	4.91319	0.000482253	0.0416884	11.9168	FJ
20240112_7	5	c	2	453	4.71875		0.00378086
20240112_7	5	c	3	476	4.95833		0.000203752
20240112_7	5	c	4	499	5.19792		0.00810667
20240112_7	5	c	5	470	4.89583		3.01408e-05
20240112_7	5	c	6	499	5.19792		0.00810667
20240112_7	5	c	7	465	4.84375		0.000482253
20240112_7	5	c	8	487	5.07292		0.00255112
20240112_7	5	c	9	431	4.48958		0.0179446
20240112_7	5	d	1	306	3.1875	3.14479	0.0001824	0.0221018	9.39249	FJ
20240112_7	5	d	2	272	2.83333		0.00970063
20240112_7	5	d	3	295	3.07292		0.000516602
20240112_7	5	d	4	306	3.1875		0.0001824
20240112_7	5	d	5	283	2.94792		0.00387598
20240112_7	5	d	6	317	3.30208		0.00247407
20240112_7	5	d	7	317	3.30208		0.00247407
20240112_7	5	d	8	306	3.1875		0.0001824
20240112_7	5	d	9	300	3.125		3.9171e-05
20240112_7	5	d	10	317	3.30208		0.00247407
20240112_7	5	e	1	295	3.07292	2.80339	0.00726471	0.0685642	8.89846	I
20240112_7	5	e	2	306	3.1875		0.0147544
20240112_7	5	e	3	227	2.36458		0.0192547
20240112_7	5	e	4	238	2.47917		0.0105118
20240112_7	5	e	5	283	2.94792		0.00208893
20240112_7	5	e	6	283	2.94792		0.00208893
20240112_7	5	e	7	238	2.47917		0.0105118
20240112_7	5	e	8	283	2.94792		0.00208893
20240119_4	5	a	1	633	6.59375	6.71875	0.0015625	0.0294271	14.1882	M
20240119_4	5	a	2	633	6.59375		0.0015625
20240119_4	5	a	3	661	6.88542		0.00277778
20240119_4	5	a	4	627	6.53125		0.00351563
20240119_4	5	a	5	661	6.88542		0.00277778
20240119_4	5	a	6	633	6.59375		0.0015625
20240119_4	5	a	7	633	6.59375		0.0015625
20240119_4	5	a	8	661	6.88542		0.00277778
20240119_4	5	a	9	675	7.03125		0.00976562
20240119_4	5	a	10	633	6.59375		0.0015625
20240119_4	5	b	1	675	7.03125	6.85625	0.0030625	0.0374306	14.3612	M
20240119_4	5	b	2	633	6.59375		0.00689063
20240119_4	5	b	3	647	6.73958		0.00136111
20240119_4	5	b	4	689	7.17708		0.0102934
20240119_4	5	b	5	633	6.59375		0.00689063
20240119_4	5	b	6	647	6.73958		0.00136111
20240119_4	5	b	7	647	6.73958		0.00136111
20240119_4	5	b	8	675	7.03125		0.0030625
20240119_4	5	b	9	661	6.88542		8.50694e-05
20240119_4	5	b	10	675	7.03125		0.0030625
20240119_4	5	c	1	637	6.63542	6.58854	0.000219727	0.0188856	14.0244	M
20240119_4	5	c	2	654	6.8125		0.00501573
20240119_4	5	c	3	647	6.73958		0.00228136
20240119_4	5	c	4	620	6.45833		0.00169542
20240119_4	5	c	5	620	6.45833		0.00169542
20240119_4	5	c	6	620	6.45833		0.00169542
20240119_4	5	c	7	620	6.45833		0.00169542
20240119_4	5	c	8	640	6.66667		0.000610352
20240119_4	5	c	9	647	6.73958		0.00228136
20240119_4	5	c	10	620	6.45833		0.00169542
20240119_4	5	d	1	558	5.8125	4.61458	0.1435	1.65695	11.5411	M
20240119_4	5	d	2	578	6.02083		0.197754
20240119_4	5	d	3	578	6.02083		0.197754
20240119_4	5	d	4	551	5.73958		0.126562
20240119_4	5	d	5	530	5.52083		0.0821289
20240119_4	5	d	6	592	6.16667		0.240896
20240119_4	5	d	7	585	6.09375		0.218793
20240119_4	5	d	8	537	5.59375		0.0958767
20240119_4	5	d	9	578	6.02083		0.197754
20240119_4	5	d	10	558	5.8125		0.1435
20240119_4	5	e	1	275	2.86458	2.84583	3.51562e-05	0.0160113	8.9599	I
20240119_4	5	e	2	289	3.01042		0.00270877
20240119_4	5	e	3	262	2.72917		0.00136111
20240119_4	5	e	4	262	2.72917		0.00136111
20240119_4	5	e	5	275	2.86458		3.51562e-05
20240119_4	5	e	6	275	2.86458		3.51562e-05
20240119_4	5	e	7	248	2.58333		0.00689063
20240119_4	5	e	8	275	2.86458		3.51562e-05
20240119_4	5	e	9	282	2.9375		0.000840278
20240119_4	5	e	10	289	3.01042		0.00270877
20240119_5	3	a	1	429	4.46875	4.54745	0.000688253	0.0102023	11.4567	FJ
20240119_5	3	a	2	429	4.46875		0.000688253
20240119_5	3	a	3	429	4.46875		0.000688253
20240119_5	3	a	4	453	4.71875		0.00326027
20240119_5	3	a	5	437	4.55208		2.3815e-06
20240119_5	3	a	6	441	4.59375		0.00023815
20240119_5	3	a	7	429	4.46875		0.000688253
20240119_5	3	a	8	429	4.46875		0.000688253
20240119_5	3	a	9	453	4.71875		0.00326027
20240119_5	3	b	1	692	7.20833	7.1875	4.82253e-05	0.0387249	14.7779	M
20240119_5	3	b	2	676	7.04167		0.00236304
20240119_5	3	b	3	660	6.875		0.0108507
20240119_5	3	b	4	660	6.875		0.0108507
20240119_5	3	b	5	709	7.38542		0.00435233
20240119_5	3	b	6	701	7.30208		0.00145882
20240119_5	3	b	7	709	7.38542		0.00435233
20240119_5	3	b	8	692	7.20833		4.82253e-05
20240119_5	3	b	9	692	7.20833		4.82253e-05
20240119_5	3	b	10	709	7.38542		0.00435233
20240119_5	3	c	1	495	5.15625	5.19688	0.000165039	0.00912435	12.2737	M
20240119_5	3	c	2	503	5.23958		0.0001824
20240119_5	3	c	3	495	5.15625		0.000165039
20240119_5	3	c	4	495	5.15625		0.000165039
20240119_5	3	c	5	495	5.15625		0.000165039
20240119_5	3	c	6	511	5.32292		0.00158865
20240119_5	3	c	7	511	5.32292		0.00158865
20240119_5	3	c	8	503	5.23958		0.0001824
20240119_5	3	c	9	478	4.97917		0.00473969
20240119_5	3	c	10	503	5.23958		0.0001824
20240201_12	4	a	1	554	5.77083	5.65833	0.00126563	0.00904514	13.0225	M
20240201_12	4	a	2	535	5.57292		0.000729601
20240201_12	4	a	3	528	5.5		0.00250694
20240201_12	4	a	4	554	5.77083		0.00126563
20240201_12	4	a	5	548	5.70833		0.00025
20240201_12	4	a	6	554	5.77083		0.00126563
20240201_12	4	a	7	541	5.63542		5.25174e-05
20240201_12	4	a	8	548	5.70833		0.00025
20240201_12	4	a	9	535	5.57292		0.000729601
20240201_12	4	a	10	535	5.57292		0.000729601
20240201_13	4	a	1	559	5.82292	5.75208	0.000501736	0.0329818	12.9721	M
20240201_13	4	a	2	559	5.82292		0.000501736
20240201_13	4	a	3	505	5.26042		0.0241736
20240201_13	4	a	4	559	5.82292		0.000501736
20240201_13	4	a	5	548	5.70833		0.000191406
20240201_13	4	a	6	548	5.70833		0.000191406
20240201_13	4	a	7	547	5.69792		0.000293403
20240201_13	4	a	8	559	5.82292		0.000501736
20240201_13	4	a	9	569	5.92708		0.0030625
20240201_13	4	a	10	569	5.92708		0.0030625
20240201_13	4	b	1	422	4.39583	4.48438	0.000783963	0.00352105	11.3773	FJ
20240201_13	4	b	2	430	4.47917		2.71267e-06
20240201_13	4	b	3	438	4.5625		0.000610352
20240201_13	4	b	4	427	4.44792		0.000132921
20240201_13	4	b	5	424	4.41667		0.000458442
20240201_13	4	b	6	435	4.53125		0.000219727
20240201_13	4	b	7	432	4.5		2.44141e-05
20240201_13	4	b	8	438	4.5625		0.000610352
20240201_13	4	b	9	435	4.53125		0.000219727
20240201_13	4	b	10	424	4.41667		0.000458442
20240201_13	4	c	1	357	3.71875	3.74792	8.50694e-05	0.00361979	10.2647	FJ
20240201_13	4	c	2	371	3.86458		0.00136111
20240201_13	4	c	3	365	3.80208		0.000293403
20240201_13	4	c	4	360	3.75		4.34028e-07
20240201_13	4	c	5	353	3.67708		0.000501736
20240201_13	4	c	6	349	3.63542		0.00126563
20240201_13	4	c	7	363	3.78125		0.000111111
20240201_13	4	c	8	360	3.75		4.34028e-07
20240201_13	4	c	9	360	3.75		4.34028e-07
20240201_13	4	c	10	360	3.75		4.34028e-07
20240201_14	4	a	1	372	3.875	4.03542	0.00257335	0.0136545	10.6802	FJ
20240201_14	4	a	2	389	4.05208		2.77778e-05
20240201_14	4	a	3	406	4.22917		0.00375391
20240201_14	4	a	4	372	3.875		0.00257335
20240201_14	4	a	5	406	4.22917		0.00375391
20240201_14	4	a	6	389	4.05208		2.77778e-05
20240201_14	4	a	7	381	3.96875		0.000444444
20240201_14	4	a	8	389	4.05208		2.77778e-05
20240201_14	4	a	9	389	4.05208		2.77778e-05
20240201_14	4	a	10	381	3.96875		0.000444444
20240308_2	2	a	1	672	7	7.06042	0.000365017	0.00622396	14.618	M
20240308_2	2	a	2	672	7		0.000365017
20240308_2	2	a	3	680	7.08333		5.25174e-05
20240308_2	2	a	4	694	7.22917		0.00284766
20240308_2	2	a	5	669	6.96875		0.000840278
20240308_2	2	a	6	680	7.08333		5.25174e-05
20240308_2	2	a	7	687	7.15625		0.000918403
20240308_2	2	a	8	672	7		0.000365017
20240308_2	2	a	9	672	7		0.000365017
20240308_2	2	a	10	680	7.08333		5.25174e-05
20240308_2	2	c	1	732	7.625	7.75312	0.0016416	0.00918077	15.4894	M
20240308_2	2	c	2	739	7.69792		0.000304796
20240308_2	2	c	3	739	7.69792		0.000304796
20240308_2	2	c	4	753	7.84375		0.000821289
20240308_2	2	c	5	731	7.61458		0.00191938
20240308_2	2	c	6	739	7.69792		0.000304796
20240308_2	2	c	7	750	7.8125		0.000352539
20240308_2	2	c	8	757	7.88542		0.00175011
20240308_2	2	c	9	746	7.77083		3.13585e-05
20240308_2	2	c	10	757	7.88542		0.00175011
20240308_9	2	a	1	344	3.58333	3.625	0.000173611	0.00347222	10.087	FJ
20240308_9	2	a	2	344	3.58333		0.000173611
20240308_9	2	a	3	356	3.70833		0.000694444
20240308_9	2	a	4	348	3.625		0
20240308_9	2	a	5	348	3.625		0
20240308_9	2	a	6	352	3.66667		0.000173611
20240308_9	2	a	7	356	3.70833		0.000694444
20240308_9	2	a	8	340	3.54167		0.000694444
20240308_9	2	a	9	340	3.54167		0.000694444
20240308_9	2	a	10	352	3.66667		0.000173611
20240308_9	2	b	1	346	3.60417	3.61979	2.44141e-05	0.00601671	10.2897	FJ
20240308_9	2	b	2	340	3.54167		0.000610352
20240308_9	2	b	3	333	3.46875		0.00228136
20240308_9	2	b	4	356	3.70833		0.000783963
20240308_9	2	b	5	356	3.70833		0.000783963
20240308_9	2	b	6	350	3.64583		6.78168e-05
20240308_9	2	b	7	348	3.625		2.71267e-06
20240308_9	2	b	8	340	3.54167		0.000610352
20240308_9	2	b	9	356	3.70833		0.000783963
20240308_9	2	b	10	350	3.64583		6.78168e-05
20240321_8	2	a	1	520	5.41667	5.32917	0.000765625	0.00234809	12.4401	M
20240321_8	2	a	2	510	5.3125		2.77778e-05
20240321_8	2	a	3	505	5.26042		0.000472656
20240321_8	2	a	4	515	5.36458		0.000125434
20240321_8	2	a	5	515	5.36458		0.000125434
20240321_8	2	a	6	505	5.26042		0.000472656
20240321_8	2	a	7	515	5.36458		0.000125434
20240321_8	2	a	8	507	5.28125		0.000229601
20240321_8	2	a	9	512	5.33333		1.73611e-06
20240321_8	2	a	10	512	5.33333		1.73611e-06
20240327_19	1	a	1	535	5.57292	5.6875	0.00131293	0.0128038	12.8909	M
20240327_19	1	a	2	560	5.83333		0.00212674
20240327_19	1	a	3	548	5.70833		4.34028e-05
20240327_19	1	a	4	560	5.83333		0.00212674
20240327_19	1	a	5	539	5.61458		0.000531684
20240327_19	1	a	6	556	5.79167		0.00108507
20240327_19	1	a	7	554	5.77083		0.000694444
20240327_19	1	a	8	531	5.53125		0.00244141
20240327_19	1	a	9	546	5.6875		0
20240327_19	1	a	10	531	5.53125		0.00244141
20240328_11	6	a	1	429	4.46875	4.47604	5.31684e-06	0.0018023	11.3669	FJ
20240328_11	6	a	2	430	4.47917		9.76562e-07
20240328_11	6	a	3	433	4.51042		0.000118164
20240328_11	6	a	4	427	4.44792		7.91016e-05
20240328_11	6	a	5	427	4.44792		7.91016e-05
20240328_11	6	a	6	421	4.38542		0.000821289
20240328_11	6	a	7	436	4.54167		0.000430664
20240328_11	6	a	8	433	4.51042		0.000118164
20240328_11	6	a	9	428	4.45833		3.13585e-05
20240328_11	6	a	10	433	4.51042		0.000118164
20240328_11	6	b	1	470	4.89583	4.91435	3.42936e-05	0.0116614	11.9183	FJ
20240328_11	6	b	2	445	4.63542		0.00778048
20240328_11	6	b	3	466	4.85417		0.000362226
20240328_11	6	b	4	470	4.89583		3.42936e-05
20240328_11	6	b	5	479	4.98958		0.000565978
20240328_11	6	b	6	476	4.95833		0.000193437
20240328_11	6	b	7	476	4.95833		0.000193437
20240328_11	6	b	8	470	4.89583		3.42936e-05
20240328_11	6	b	9	479	4.98958		0.000565978
20240328_11	6	b	10	485	5.05208		0.001897
20240328_11	6	c	1	237	2.46875	2.46354	2.71267e-06	0.00345595	8.40646	I
20240328_11	6	c	2	239	2.48958		6.78168e-05
20240328_11	6	c	3	232	2.41667		0.000219727
20240328_11	6	c	4	223	2.32292		0.00197754
20240328_11	6	c	5	239	2.48958		6.78168e-05
20240328_11	6	c	6	236	2.45833		2.71267e-06
20240328_11	6	c	7	246	2.5625		0.000979275
20240328_11	6	c	8	236	2.45833		2.71267e-06
20240328_11	6	c	9	237	2.46875		2.71267e-06
20240328_11	6	c	10	240	2.5		0.000132921
20240328_11	6	d	1	575	5.98958	5.84167	0.00218793	0.00704861	13.0848	M
20240328_11	6	d	2	553	5.76042		0.000660156
20240328_11	6	d	3	559	5.82292		3.51563e-05
20240328_11	6	d	4	562	5.85417		1.5625e-05
20240328_11	6	d	5	562	5.85417		1.5625e-05
20240328_11	6	d	6	575	5.98958		0.00218793
20240328_11	6	d	7	552	5.75		0.000840278
20240328_11	6	d	8	552	5.75		0.000840278
20240328_11	6	d	9	556	5.79167		0.00025
20240328_11	6	d	10	562	5.85417		1.5625e-05
20240328_11	6	e	1	201	2.09375	2.18021	0.000747504	0.00206272	7.99609	I
20240328_11	6	e	2	206	2.14583		0.000118164
20240328_11	6	e	3	208	2.16667		1.83377e-05
20240328_11	6	e	4	205	2.13542		0.000200629
20240328_11	6	e	5	209	2.17708		9.76563e-07
20240328_11	6	e	6	208	2.16667		1.83377e-05
20240328_11	6	e	7	214	2.22917		0.000239692
20240328_11	6	e	8	214	2.22917		0.000239692
20240328_11	6	e	9	214	2.22917		0.000239692
20240328_11	6	e	10	214	2.22917		0.000239692
20240328_11	6	f	1	260	2.70833	2.66875	0.000156684	0.000755208	8.70357
20240328_11	6	f	2	260	2.70833		0.000156684
20240328_11	6	f	3	254	2.64583		5.25174e-05
20240328_11	6	f	4	257	2.67708		6.94444e-06
20240328_11	6	f	5	255	2.65625		1.5625e-05
20240328_11	6	f	6	260	2.70833		0.000156684
20240328_11	6	f	7	254	2.64583		5.25174e-05
20240328_11	6	f	8	254	2.64583		5.25174e-05
20240328_11	6	f	9	254	2.64583		5.25174e-05
20240328_11	6	f	10	254	2.64583		5.25174e-05
20240409_13	5	a	1	487	5.07292	5.00625	0.000444444	0.00269531	12.082	M
20240409_13	5	a	2	482	5.02083		2.12674e-05
20240409_13	5	a	3	487	5.07292		0.000444444
20240409_13	5	a	4	479	4.98958		2.77778e-05
20240409_13	5	a	5	470	4.89583		0.00121918
20240409_13	5	a	6	482	5.02083		2.12674e-05
20240409_13	5	a	7	482	5.02083		2.12674e-05
20240409_13	5	a	8	476	4.95833		0.000229601
20240409_13	5	a	9	484	5.04167		0.000125434
20240409_13	5	a	10	477	4.96875		0.000140625
20240409_13	5	b	1	448	4.66667	4.56979	0.000938477	0.00690213	11.4848	FJ
20240409_13	5	b	2	437	4.55208		3.13585e-05
20240409_13	5	b	3	443	4.61458		0.000200629
20240409_13	5	b	4	421	4.38542		0.00339941
20240409_13	5	b	5	430	4.47917		0.000821289
20240409_13	5	b	6	447	4.65625		0.000747504
20240409_13	5	b	7	443	4.61458		0.000200629
20240409_13	5	b	8	440	4.58333		1.83377e-05
20240409_13	5	b	9	444	4.625		0.000304796
20240409_13	5	b	10	434	4.52083		0.000239692
20240409_13	5	c	1	268	2.79167	2.87083	0.000626736	0.00935764	9.34751	FJ
20240409_13	5	c	2	271	2.82292		0.000229601
20240409_13	5	c	3	280	2.91667		0.000210069
20240409_13	5	c	4	274	2.85417		2.77778e-05
20240409_13	5	c	5	266	2.77083		0.001
20240409_13	5	c	6	263	2.73958		0.00172266
20240409_13	5	c	7	270	2.8125		0.000340278
20240409_13	5	c	8	291	3.03125		0.00257335
20240409_13	5	c	9	285	2.96875		0.000958767
20240409_13	5	c	10	288	3		0.0016684
20240409_15	5	b	1	200	2.08333	1.9875	0.000918403	0.0037066	7.71689	I
20240409_15	5	b	2	184	1.91667		0.000501736
20240409_15	5	b	3	183	1.90625		0.000660156
20240409_15	5	b	4	199	2.07292		0.000729601
20240409_15	5	b	5	188	1.95833		8.50694e-05
20240409_15	5	b	6	197	2.05208		0.000417101
20240409_15	5	b	7	188	1.95833		8.50694e-05
20240409_15	5	b	8	193	2.01042		5.25174e-05
20240409_15	5	b	9	186	1.9375		0.00025
20240409_15	5	b	10	190	1.97917		6.94444e-06
20240409_15	5	a	1	279	2.90625	2.85521	0.000260525	0.00612956	8.97347	I
20240409_15	5	a	2	284	2.95833		0.00106348
20240409_15	5	a	3	275	2.86458		8.78906e-06
20240409_15	5	a	4	276	2.875		3.9171e-05
20240409_15	5	a	5	276	2.875		3.9171e-05
20240409_15	5	a	6	263	2.73958		0.00133691
20240409_15	5	a	7	268	2.79167		0.000403754
20240409_15	5	a	8	286	2.97917		0.00153657
20240409_15	5	a	9	263	2.73958		0.00133691
20240409_15	5	a	10	271	2.82292		0.000104275
20240409_15	5	c	1	237	2.46875	2.59063	0.00148535	0.00672852	8.59047	I
20240409_15	5	c	2	240	2.5		0.000821289
20240409_15	5	c	3	253	2.63542		0.000200629
20240409_15	5	c	4	245	2.55208		0.000148546
20240409_15	5	c	5	243	2.53125		0.000352539
20240409_15	5	c	6	250	2.60417		1.83377e-05
20240409_15	5	c	7	255	2.65625		0.000430664
20240409_15	5	c	8	250	2.60417		1.83377e-05
20240409_15	5	c	9	248	2.58333		5.31684e-06
20240409_15	5	c	10	266	2.77083		0.0032475
20240409_30	3	a	1	486	5.0625	5.06458	4.34028e-07	0.00414063	12.1072	M
20240409_30	3	a	2	485	5.05208		1.5625e-05
20240409_30	3	a	3	497	5.17708		0.00126563
20240409_30	3	a	4	482	5.02083		0.000191406
20240409_30	3	a	5	490	5.10417		0.000156684
20240409_30	3	a	6	483	5.03125		0.000111111
20240409_30	3	a	7	495	5.15625		0.000840278
20240409_30	3	a	8	487	5.07292		6.94444e-06
20240409_30	3	a	9	482	5.02083		0.000191406
20240409_30	3	a	10	475	4.94792		0.00136111
20240409_30	3	b	1	418	4.35417	4.41771	0.000403754	0.000812717	11.2935	FJ
20240409_30	3	b	2	425	4.42708		8.78906e-06
20240409_30	3	b	3	425	4.42708		8.78906e-06
20240409_30	3	b	4	423	4.40625		1.31293e-05
20240409_30	3	b	5	425	4.42708		8.78906e-06
20240409_30	3	b	6	423	4.40625		1.31293e-05
20240409_30	3	b	7	428	4.45833		0.000165039
20240409_30	3	b	8	423	4.40625		1.31293e-05
20240409_30	3	b	9	423	4.40625		1.31293e-05
20240409_30	3	b	10	428	4.45833		0.000165039
20240409_30	3	c	1	634	6.60417	6.63125	7.33507e-05	0.0129601	14.0781	M
20240409_30	3	c	2	647	6.73958		0.00117361
20240409_30	3	c	3	647	6.73958		0.00117361
20240409_30	3	c	4	655	6.82292		0.00367361
20240409_30	3	c	5	616	6.41667		0.0046046
20240409_30	3	c	6	634	6.60417		7.33507e-05
20240409_30	3	c	7	629	6.55208		0.000626736
20240409_30	3	c	8	629	6.55208		0.000626736
20240409_30	3	c	9	631	6.57292		0.000340278
20240409_30	3	c	10	644	6.70833		0.000594184
20240409_33	2	a	1	544	5.66667	5.58542	0.000660156	0.0100868	12.7625	M
20240409_33	2	a	2	528	5.5		0.000729601
20240409_33	2	a	3	544	5.66667		0.000660156
20240409_33	2	a	4	518	5.39583		0.00359418
20240409_33	2	a	5	539	5.61458		8.50694e-05
20240409_33	2	a	6	539	5.61458		8.50694e-05
20240409_33	2	a	7	554	5.77083		0.00343793
20240409_33	2	a	8	528	5.5		0.000729601
20240409_33	2	a	9	534	5.5625		5.25174e-05
20240409_33	2	a	10	534	5.5625		5.25174e-05
20240409_33	2	b	1	212	2.20833	2.22396	2.44141e-05	0.00219727	8.05947	I
20240409_33	2	b	2	207	2.15625		0.000458442
20240409_33	2	b	3	206	2.14583		0.000610352
20240409_33	2	b	4	215	2.23958		2.44141e-05
20240409_33	2	b	5	218	2.27083		0.000219727
20240409_33	2	b	6	215	2.23958		2.44141e-05
20240409_33	2	b	7	221	2.30208		0.000610352
20240409_33	2	b	8	216	2.25		6.78168e-05
20240409_33	2	b	9	215	2.23958		2.44141e-05
20240409_33	2	b	10	210	2.1875		0.000132921
20240415_7	5	a	1	490	5.10417	5.16771	0.000403754	0.0137901	12.315	M
20240415_7	5	a	2	504	5.25		0.000677192
20240415_7	5	a	3	497	5.17708		8.78906e-06
20240415_7	5	a	4	514	5.35417		0.00347667
20240415_7	5	a	5	501	5.21875		0.000260525
20240415_7	5	a	6	506	5.27083		0.00106348
20240415_7	5	a	7	504	5.25		0.000677192
20240415_7	5	a	8	482	5.02083		0.00215723
20240415_7	5	a	9	486	5.0625		0.00110688
20240415_7	5	a	10	477	4.96875		0.00395844
20240415_7	5	b	1	337	3.51042	3.33958	0.0029184	0.0218576	9.67426	FJ
20240415_7	5	b	2	337	3.51042		0.0029184
20240415_7	5	b	3	320	3.33333		3.90625e-06
20240415_7	5	b	4	309	3.21875		0.00146007
20240415_7	5	b	5	306	3.1875		0.00231293
20240415_7	5	b	6	304	3.16667		0.00299002
20240415_7	5	b	7	323	3.36458		6.25e-05
20240415_7	5	b	8	333	3.46875		0.0016684
20240415_7	5	b	9	300	3.125		0.0046046
20240415_7	5	b	10	337	3.51042		0.0029184
20240415_7	5	c	1	412	4.29167	4.11667	0.0030625	0.0265365	10.7976	FJ
20240415_7	5	c	2	399	4.15625		0.000156684
20240415_7	5	c	3	407	4.23958		0.00151085
20240415_7	5	c	4	394	4.10417		1.5625e-05
20240415_7	5	c	5	390	4.0625		0.000293403
20240415_7	5	c	6	374	3.89583		0.00487674
20240415_7	5	c	7	394	4.10417		1.5625e-05
20240415_7	5	c	8	385	4.01042		0.00112891
20240415_7	5	c	9	372	3.875		0.00584028
20240415_7	5	c	10	425	4.42708		0.00963585
20240415_7	5	d	1	306	3.1875	3.19583	6.94444e-06	0.00490017	9.46633	FJ
20240415_7	5	d	2	315	3.28125		0.000729601
20240415_7	5	d	3	310	3.22917		0.000111111
20240415_7	5	d	4	320	3.33333		0.00189062
20240415_7	5	d	5	306	3.1875		6.94444e-06
20240415_7	5	d	6	309	3.21875		5.25174e-05
20240415_7	5	d	7	302	3.14583		0.00025
20240415_7	5	d	8	304	3.16667		8.50694e-05
20240415_7	5	d	9	296	3.08333		0.00126563
20240415_7	5	d	10	300	3.125		0.000501736
20240415_7	5	e	1	223	2.32292	2.38333	0.000365017	0.00505208	8.2903	I
20240415_7	5	e	2	231	2.40625		5.25174e-05
20240415_7	5	e	3	219	2.28125		0.0010421
20240415_7	5	e	4	223	2.32292		0.000365017
20240415_7	5	e	5	236	2.45833		0.0005625
20240415_7	5	e	6	232	2.41667		0.000111111
20240415_7	5	e	7	235	2.44792		0.000417101
20240415_7	5	e	8	241	2.51042		0.00161502
20240415_7	5	e	9	223	2.32292		0.000365017
20240415_7	5	e	10	225	2.34375		0.000156684
20240424_11	2	a	1		0	0	0	0	4.833	I
20240424_11	2	a	2		0		0
20240424_11	2	a	3		0		0
20240424_11	2	a	4		0		0
20240424_11	2	a	5		0		0
20240424_11	2	a	6		0		0
20240424_11	2	a	7		0		0
20240424_11	2	a	8		0		0
20240424_11	2	a	9		0		0
20240424_11	2	a	10		0		0
20240424_11	2	b	1	177	1.84375	1.87917	0.000125434	0.00230469	7.5599	I
20240424_11	2	b	2	183	1.90625		7.33507e-05
20240424_11	2	b	3	171	1.78125		0.000958767
20240424_11	2	b	4	184	1.91667		0.000140625
20240424_11	2	b	5	184	1.91667		0.000140625
20240424_11	2	b	6	187	1.94792		0.000472656
20240424_11	2	b	7	179	1.86458		2.12674e-05
20240424_11	2	b	8	184	1.91667		0.000140625
20240424_11	2	b	9	179	1.86458		2.12674e-05
20240424_11	2	b	10	176	1.83333		0.000210069
20240424_13	9	a	1	472	4.91667	4.95521	0.000148546	0.010179	11.9697	FJ
20240424_13	9	a	2	468	4.875		0.000643338
20240424_13	9	a	3	476	4.95833		9.76562e-07
20240424_13	9	a	4	487	5.07292		0.00138553
20240424_13	9	a	5	489	5.09375		0.00191938
20240424_13	9	a	6	476	4.95833		9.76562e-07
20240424_13	9	a	7	460	4.79167		0.00267459
20240424_13	9	a	8	464	4.83333		0.00148535
20240424_13	9	a	9	476	4.95833		9.76562e-07
20240424_13	9	a	10	489	5.09375		0.00191938
20240424_13	9	b	1	431	4.48958	4.38958	0.001	0.00499566	11.2581	FJ
20240424_13	9	b	2	418	4.35417		0.000125434
20240424_13	9	b	3	414	4.3125		0.000594184
20240424_13	9	b	4	427	4.44792		0.000340278
20240424_13	9	b	5	431	4.48958		0.001
20240424_13	9	b	6	414	4.3125		0.000594184
20240424_13	9	b	7	412	4.29167		0.000958767
20240424_13	9	b	8	427	4.44792		0.000340278
20240424_13	9	b	9	420	4.375		2.12674e-05
20240424_13	9	b	10	420	4.375		2.12674e-05
20240424_13	9	c	1	207	2.15625	2.34896	0.00371365	0.0105957	8.24052	I
20240424_13	9	c	2	217	2.26042		0.000783963
20240424_13	9	c	3	220	2.29167		0.000328234
20240424_13	9	c	4	217	2.26042		0.000783963
20240424_13	9	c	5	240	2.5		0.00228136
20240424_13	9	c	6	236	2.45833		0.00119629
20240424_13	9	c	7	236	2.45833		0.00119629
20240424_13	9	c	8	228	2.375		6.78168e-05
20240424_13	9	c	9	230	2.39583		0.000219727
20240424_13	9	c	10	224	2.33333		2.44141e-05
20240424_13	9	d	1	497	5.17708	5.05104	0.00158865	0.0191504	12.0902	M
20240424_13	9	d	2	497	5.17708		0.00158865
20240424_13	9	d	3	501	5.21875		0.00281261
20240424_13	9	d	4	497	5.17708		0.00158865
20240424_13	9	d	5	480	5		0.000260525
20240424_13	9	d	6	493	5.13542		0.000711914
20240424_13	9	d	7	480	5		0.000260525
20240424_13	9	d	8	476	4.95833		0.000859484
20240424_13	9	d	9	464	4.83333		0.00473969
20240424_13	9	d	10	464	4.83333		0.00473969
20240424_18	9	a	1	513	5.34375	5.40417	0.000365017	0.00585503	12.5344	M
20240424_18	9	a	2	526	5.47917		0.0005625
20240424_18	9	a	3	529	5.51042		0.00112891
20240424_18	9	a	4	519	5.40625		4.34028e-07
20240424_18	9	a	5	518	5.39583		6.94444e-06
20240424_18	9	a	6	508	5.29167		0.00126563
20240424_18	9	a	7	513	5.34375		0.000365017
20240424_18	9	a	8	510	5.3125		0.000840278
20240424_18	9	a	9	529	5.51042		0.00112891
20240424_18	9	a	10	523	5.44792		0.000191406
20240424_18	9	b	1	513	5.34375	5.48333	0.00194835	0.011224	12.634	M
20240424_18	9	b	2	532	5.54167		0.000340278
20240424_18	9	b	3	534	5.5625		0.000626736
20240424_18	9	b	4	510	5.3125		0.0029184
20240424_18	9	b	5	519	5.40625		0.000594184
20240424_18	9	b	6	532	5.54167		0.000340278
20240424_18	9	b	7	526	5.47917		1.73611e-06
20240424_18	9	b	8	542	5.64583		0.00264063
20240424_18	9	b	9	537	5.59375		0.00121918
20240424_18	9	b	10	519	5.40625		0.000594184
20240424_18	9	c	1	261	2.71875	2.92917	0.00442752	0.0137543	9.0805	FJ
20240424_18	9	c	2	268	2.79167		0.00189062
20240424_18	9	c	3	287	2.98958		0.000365017
20240424_18	9	c	4	281	2.92708		4.34028e-07
20240424_18	9	c	5	274	2.85417		0.0005625
20240424_18	9	c	6	301	3.13542		0.00425391
20240424_18	9	c	7	294	3.0625		0.00177778
20240424_18	9	c	8	278	2.89583		0.000111111
20240424_18	9	c	9	287	2.98958		0.000365017
20240424_18	9	c	10	281	2.92708		4.34028e-07
20240424_18	9	d	1	330	3.4375	3.2625	0.0030625	0.0180946	9.56277	FJ
20240424_18	9	d	2	320	3.33333		0.000501736
20240424_18	9	d	3	297	3.09375		0.00284766
20240424_18	9	d	4	307	3.19792		0.000417101
20240424_18	9	d	5	284	2.95833		0.00925174
20240424_18	9	d	6	314	3.27083		6.94444e-06
20240424_18	9	d	7	320	3.33333		0.000501736
20240424_18	9	d	8	320	3.33333		0.000501736
20240424_18	9	d	9	320	3.33333		0.000501736
20240424_18	9	d	10	320	3.33333		0.000501736
20240424_15	9	a	1	295	3.07292	3.02917	0.000191406	0.00118924	9.2252	FJ
20240424_15	9	a	2	294	3.0625		0.000111111
20240424_15	9	a	3	289	3.01042		3.51562e-05
20240424_15	9	a	4	294	3.0625		0.000111111
20240424_15	9	a	5	284	2.95833		0.000501736
20240424_15	9	a	6	290	3.02083		6.94444e-06
20240424_15	9	a	7	294	3.0625		0.000111111
20240424_15	9	a	8	288	3		8.50694e-05
20240424_15	9	a	9	289	3.01042		3.51562e-05
20240424_15	9	a	10	291	3.03125		4.34028e-07
20240504_6	7	a	1	271	2.82292	2.74583	0.000594184	0.00421441	8.81516	I
20240504_6	7	a	2	269	2.80208		0.000316406
20240504_6	7	a	3	273	2.84375		0.000958767
20240504_6	7	a	4	256	2.66667		0.000626736
20240504_6	7	a	5	256	2.66667		0.000626736
20240504_6	7	a	6	265	2.76042		2.12674e-05
20240504_6	7	a	7	265	2.76042		2.12674e-05
20240504_6	7	a	8	254	2.64583		0.001
20240504_6	7	a	9	262	2.72917		2.77778e-05
20240504_6	7	a	10	265	2.76042		2.12674e-05
20240504_6	7	b	1	290	3.02083	3	4.34028e-05	0.000868056	9.183	FJ
20240504_6	7	b	2	290	3.02083		4.34028e-05
20240504_6	7	b	3	286	2.97917		4.34028e-05
20240504_6	7	b	4	286	2.97917		4.34028e-05
20240504_6	7	b	5	294	3.0625		0.000390625
20240504_6	7	b	6	290	3.02083		4.34028e-05
20240504_6	7	b	7	288	3		0
20240504_6	7	b	8	286	2.97917		4.34028e-05
20240504_6	7	b	9	286	2.97917		4.34028e-05
20240504_6	7	b	10	284	2.95833		0.000173611
20240504_6	7	c	1	316	3.29167	3.31146	3.9171e-05	0.00419813	9.63358	FJ
20240504_6	7	c	2	324	3.375		0.000403754
20240504_6	7	c	3	324	3.375		0.000403754
20240504_6	7	c	4	311	3.23958		0.000516602
20240504_6	7	c	5	324	3.375		0.000403754
20240504_6	7	c	6	316	3.29167		3.9171e-05
20240504_6	7	c	7	307	3.19792		0.00128917
20240504_6	7	c	8	324	3.375		0.000403754
20240504_6	7	c	9	322	3.35417		0.0001824
20240504_6	7	c	10	311	3.23958		0.000516602
20240504_6	7	d	1	351	3.65625	3.73958	0.000694444	0.00407986	10.2526	FJ
20240504_6	7	d	2	347	3.61458		0.0015625
20240504_6	7	d	3	360	3.75		1.08507e-05
20240504_6	7	d	4	366	3.8125		0.000531684
20240504_6	7	d	5	356	3.70833		9.76563e-05
20240504_6	7	d	6	360	3.75		1.08507e-05
20240504_6	7	d	7	360	3.75		1.08507e-05
20240504_6	7	d	8	358	3.72917		1.08507e-05
20240504_6	7	d	9	364	3.79167		0.000271267
20240504_6	7	d	10	368	3.83333		0.000878906
20240504_6	7	e	1	256	2.66667	2.73229	0.000430664	0.00290907	8.79555	I
20240504_6	7	e	2	262	2.72917		9.76562e-07
20240504_6	7	e	3	269	2.80208		0.000487088
20240504_6	7	e	4	260	2.70833		5.74002e-05
20240504_6	7	e	5	261	2.71875		1.83377e-05
20240504_6	7	e	6	265	2.76042		7.91016e-05
20240504_6	7	e	7	256	2.66667		0.000430664
20240504_6	7	e	8	269	2.80208		0.000487088
20240504_6	7	e	9	269	2.80208		0.000487088
20240504_6	7	e	10	256	2.66667		0.000430664
20240504_6	7	f	1	294	3.0625	2.9375	0.0015625	0.00633681	9.09256	FJ
20240504_6	7	f	2	294	3.0625		0.0015625
20240504_6	7	f	3	286	2.97917		0.000173611
20240504_6	7	f	4	277	2.88542		0.000271267
20240504_6	7	f	5	286	2.97917		0.000173611
20240504_6	7	f	6	282	2.9375		0
20240504_6	7	f	7	276	2.875		0.000390625
20240504_6	7	f	8	277	2.88542		0.000271267
20240504_6	7	f	9	269	2.80208		0.00183377
20240504_6	7	f	10	279	2.90625		9.76563e-05
20240504_6	7	h	1	324	3.375	3.48646	0.0012423	0.00911567	9.88667	FJ
20240504_6	7	h	2	333	3.46875		3.13585e-05
20240504_6	7	h	3	329	3.42708		0.000352539
20240504_6	7	h	4	337	3.51042		5.74002e-05
20240504_6	7	h	5	324	3.375		0.0012423
20240504_6	7	h	6	324	3.375		0.0012423
20240504_6	7	h	7	337	3.51042		5.74002e-05
20240504_6	7	h	8	341	3.55208		0.000430664
20240504_6	7	h	9	350	3.64583		0.00254004
20240504_6	7	h	10	348	3.625		0.00191938

## Sheet: ICI
Audio_file	Duration_file	Date	Nb_observation	Nb_ind_cluster	IPI_ind	Duration_annotaiton	Time_clics	ICI	Mean_ICI	SD_ICI	Mean_SD_ICI
20240424_11	00:05:15	2024-04-24	3024	2	2.8	196.841	118.631		0.450599		6.086e-06
							118.987	0.355107		2.3871e-05
							119.472	0.485171		3.12887e-06
							119.937	0.465317		5.67074e-07
							120.404	0.467461		7.44319e-07
							120.87	0.465204		5.584e-07
							121.335	0.465204		5.584e-07
							121.797	0.462498		3.7065e-07
							122.256	0.458887		1.79823e-07
							122.716	0.460241		2.43377e-07
							123.169	0.45257		1.01707e-08
							123.613	0.443546		1.30219e-07
							124.063	0.450314		2.12498e-10
							124.521	0.458437		1.60826e-07
							124.982	0.460241		2.43377e-07
							125.435	0.453021		1.53574e-08
							125.882	0.447607		2.34333e-08
							126.323	0.440388		2.72939e-07
							126.765	0.442192		1.85016e-07
							127.22	0.454826		4.67756e-08
							127.669	0.449412		3.68785e-09
							128.118	0.449412		3.68785e-09
							128.546	0.427753		1.36632e-06
							128.99	0.443998		1.14063e-07
							129.451	0.46103		2.84837e-07
							129.909	0.457745		1.33682e-07
							130.357	0.448411		1.25313e-08
							130.789	0.431476		9.57292e-07
							131.214	0.425526		1.64568e-06
							131.64	0.425356		1.66807e-06
							132.068	0.427753		1.36632e-06
							132.49	0.422339		2.09063e-06
							132.916	0.425949		1.59062e-06
							133.345	0.428994		1.22192e-06
							133.785	0.440613		2.61043e-07
							134.234	0.448777		8.68942e-09
							134.702	0.467531		7.50512e-07
							135.178	0.476464		1.75132e-06
							135.655	0.476351		1.73605e-06
							136.149	0.494688		5.08861e-06
							136.671	0.521607		1.31993e-05
							137.208	0.536948		1.95188e-05
							137.747	0.539655		2.07617e-05
							138.26	0.512582		1.00573e-05
							138.759	0.499046		6.14429e-06
							139.254	0.495435		5.2625e-06
							139.754	0.499046		6.14429e-06
							140.243	0.489119		3.88429e-06
							140.725	0.482802		2.71476e-06
							141.193	0.46746		7.44231e-07
							141.671	0.47829		2.00732e-06
							142.18	0.508972		8.91994e-06
							142.63	0.449412		3.68785e-09
							143.052	0.422339		2.09063e-06
							143.507	0.454826		4.67756e-08
							143.972	0.465656		5.93497e-07
							144.458	0.485509		3.19035e-06
							144.981	0.523412		1.38789e-05
							145.535	0.554094		2.80399e-05
							146.052	0.516191		1.12626e-05
							146.546	0.494534		5.05312e-06
							147.033	0.487314		3.52879e-06
							147.551	0.517997		1.18914e-05
							148.113
							148.737
							149.409
							150.111
							150.784
							151.464
							152.139
							152.822
							153.509
							154.213
							154.951
							155.688
							156.408
							157.115
							157.805
							158.501
							159.217
							159.918
							160.639
							161.248
							161.774	0.526118		1.49297e-05
							162.238	0.463851		4.59733e-07
							162.692	0.454826		4.67756e-08
							163.204	0.51168		9.76675e-06
							163.743	0.538753		2.03433e-05
							164.273	0.529728		1.63911e-05
							164.784	0.51168		9.76675e-06
							165.291	0.506265		8.11182e-06
							165.791	0.500851		6.61066e-06
							166.297	0.505362		7.85077e-06
							166.816	0.518899		1.22118e-05
							167.373	0.557704		3.00301e-05
							167.919	0.545972		2.38116e-05
							168.467	0.547778		2.47219e-05
							169.02	0.553191		2.75527e-05
							169.566	0.545972		2.38116e-05
							170.133	0.566728		3.53036e-05
							170.706	0.573046		3.92494e-05
							171.269	0.563118		3.31428e-05
							171.797	0.527924		1.56523e-05
							172.298	0.50085		6.6104e-06
							172.784	0.486412		3.35753e-06
							173.259	0.47468		1.51806e-06
							173.699	0.440387		2.72992e-07
							174.113	0.413766		3.55147e-06
							174.525	0.41182		3.93666e-06
							174.937	0.411509		4.00006e-06
							175.349	0.412102		3.87961e-06
							175.771	0.421888		2.1579e-06
							176.193	0.422338		2.09078e-06
							176.603	0.409705		4.37778e-06
							177.021	0.418729		2.65888e-06
							177.422	0.400681		6.52303e-06
							177.848	0.425948		1.59075e-06
							178.282	0.434071		7.1511e-07
							178.689	0.406546		5.08026e-06
							179.073	0.384888		1.13035e-05
							179.454	0.380827		1.27438e-05
							179.836	0.381729		1.24164e-05
							180.213	0.37654		1.43579e-05
							180.59	0.377217		1.40966e-05
							180.968	0.377894		1.38377e-05
							181.386	0.418729		2.65888e-06
							181.799	0.412864		3.72755e-06
							182.191	0.391656		9.09494e-06
							182.586	0.394814		8.14648e-06
							182.968	0.382632		1.20929e-05
							183.339	0.370449		1.68168e-05
							183.714	0.374961		1.49767e-05
							184.08	0.366388		1.85641e-05
							184.458	0.37812		1.37518e-05
							184.854	0.395265		8.01529e-06
							185.242	0.388949		9.94951e-06
							185.62	0.377217		1.40966e-05
							185.999	0.379022		1.34117e-05
							186.374	0.375413		1.47982e-05
							186.756	0.381729		1.24164e-05
							187.138	0.381729		1.24164e-05
							187.532	0.394364		8.27844e-06
							187.921	0.388948		9.94983e-06
							188.297	0.376315		1.44453e-05
							188.67	0.372705		1.58834e-05
							189.044	0.37451		1.51558e-05
							189.418	0.373607		1.55177e-05
							189.819	0.400681		6.52303e-06
							190.238	0.41918		2.58416e-06
							190.697	0.459338		1.99926e-07
							191.167	0.469266		9.122e-07
							191.665	0.498594		6.03018e-06
							196.75
							197.081	0.330968		3.74648e-05
							197.503	0.422339		2.09063e-06
							197.902	0.398875		7.00357e-06
							198.292	0.389851		9.66049e-06
							198.673	0.380827		1.27438e-05
							199.097	0.424144		1.8321e-06
							199.519	0.422339		2.09063e-06
							199.914	0.395266		8.015e-06
							200.3	0.38579		1.09953e-05
							200.691	0.391205		9.23465e-06
							201.078	0.387144		1.05406e-05
							201.472	0.393912		8.41206e-06
							201.872	0.399778		6.76116e-06
							202.258	0.38579		1.09953e-05
							202.652	0.394363		8.27874e-06
							203.031	0.379022		1.34117e-05
							203.404	0.372705		1.58834e-05
							203.776	0.371803		1.62534e-05
							204.148	0.372705		1.58834e-05
							204.529	0.380827		1.27438e-05
							204.912	0.383083		1.1933e-05
							205.281	0.368192		1.77772e-05
							205.66	0.379022		1.34117e-05
							206.039	0.379022		1.34117e-05
							206.429	0.390303		9.51727e-06
							206.813	0.384436		1.14595e-05
							207.215	0.401583		6.28942e-06
							207.626	0.410608		4.18658e-06
							208.046	0.420533		2.36638e-06
							208.476	0.429559		1.15884e-06
							208.906	0.43046		1.06172e-06
							209.329	0.423242		1.95916e-06
							209.763	0.433168		7.95384e-07
							210.205	0.442192		1.85016e-07
							210.677	0.471973		1.19595e-06
							211.2	0.523411		1.38785e-05
							211.685	0.484607		3.02762e-06
							212.155	0.470168		1.00248e-06
							212.624	0.469265		9.12102e-07
							213.109	0.484607		3.02762e-06
							213.634	0.525216		1.45752e-05
							214.197	0.563118		3.31428e-05
							214.733	0.536046		1.91131e-05
							215.238	0.505362		7.85077e-06
							215.722	0.483705		2.86914e-06
							216.207	0.484606		3.02744e-06
							217.131
							217.574	0.443095		1.47405e-07
							218.002	0.427753		1.36632e-06
							218.408	0.406095		5.18481e-06
							218.818	0.409705		4.37778e-06
							219.25	0.432266		8.79831e-07
							219.688	0.438582		3.78027e-07
							220.137	0.448509		1.14338e-08
							220.611	0.473778		1.40647e-06
							221.112	0.501753		6.85011e-06
							221.612	0.499948		6.37522e-06
							222.132	0.519802		1.25368e-05
							222.635	0.502655		7.09381e-06
							223.119	0.484607		3.02762e-06
							223.581	0.461143		2.91041e-07
							224.025	0.443997		1.14097e-07
							224.465	0.440388		2.72939e-07
							224.9	0.434973		6.39186e-07
							225.313	0.413314		3.63917e-06
							225.71	0.397071		7.50062e-06
							226.117	0.406997		4.97677e-06
							226.544	0.426851		1.47634e-06
							226.994	0.449412		3.68785e-09
							227.448	0.454827		4.67977e-08
							227.925	0.476484		1.75403e-06
							228.412	0.487314		3.52879e-06
							228.874	0.462046		3.43026e-07
							229.331	0.456631		9.52516e-08
							229.776	0.4449		8.50199e-08
							230.219	0.443095		1.47405e-07
							230.66	0.44129		2.26848e-07
							231.095	0.434973		6.39186e-07
							231.524	0.428656		1.26045e-06
							231.986	0.462045		3.42966e-07
							232.461	0.475583		1.63404e-06
							232.951	0.490021		4.06833e-06
							233.456	0.50446		7.59429e-06
							233.971	0.51529		1.09553e-05
							234.522	0.550484		2.61179e-05
							235.051	0.529729		1.63915e-05
							235.578	0.526118		1.49297e-05
							236.106	0.528826		1.60196e-05
							236.608	0.501753		6.85011e-06
							237.097	0.489119		3.88429e-06
							237.586	0.489119		3.88429e-06
							238.056	0.469265		9.12102e-07
							238.54	0.484607		3.02762e-06
							239.042	0.501753		6.85011e-06
							239.544	0.501753		6.85011e-06
							240.048	0.50446		7.59429e-06
							240.546	0.498143		5.91738e-06
							241.047	0.500851		6.61066e-06
							241.564	0.517094		1.15749e-05
							242.067	0.502655		7.09381e-06
							242.558	0.490924		4.25684e-06
							243.068	0.509875		9.19805e-06
							243.596	0.527923		1.56519e-05
							244.119	0.523412		1.38789e-05
							244.666	0.546874		2.42641e-05
							245.204	0.537851		1.99291e-05
							245.744	0.540557		2.11844e-05
							246.259	0.514387		1.06516e-05
							246.766	0.507168		8.37713e-06
							247.265	0.499045		6.14404e-06
							247.742	0.477388		1.87868e-06
							248.196	0.453924		2.8943e-08
							248.608	0.411509		4.00006e-06
							249.003	0.394815		8.14619e-06
							249.403	0.400229		6.6417e-06
							249.81	0.406998		4.97654e-06
							250.224	0.413765		3.55167e-06
							250.654	0.430912		1.01459e-06
							251.075	0.420985		2.29577e-06
							251.492	0.416473		3.04863e-06
							251.902	0.410156		4.28175e-06
							252.322	0.420083		2.43775e-06
							252.757	0.434522		6.76615e-07
							253.207	0.450314		2.12498e-10
							253.652	0.445351		7.20957e-08
							254.089	0.436326		5.33288e-07
							254.513	0.424595		1.77017e-06
							254.939	0.425949		1.59062e-06
							255.367	0.427753		1.36632e-06
							255.797	0.430461		1.06161e-06
							256.222	0.424143		1.83224e-06
							256.648	0.426851		1.47634e-06
							257.073	0.424144		1.8321e-06
							257.539	0.466558		6.66734e-07
							260.06
							260.524	0.464753		5.24446e-07
							260.995	0.470167		1.00238e-06
							261.461	0.466559		6.66818e-07
							261.922	0.461143		2.91041e-07
							262.39	0.46746		7.44231e-07
							262.838	0.44851		1.14229e-08
							263.269	0.430461		1.06161e-06
							263.697	0.428655		1.26056e-06
							264.145	0.447607		2.34333e-08
							264.575	0.429559		1.15884e-06
							265.008	0.433168		7.95384e-07
							265.426	0.417826		2.81169e-06
							265.844	0.418729		2.65888e-06
							266.25	0.406095		5.18481e-06
							266.693	0.442193		1.84972e-07
							267.132	0.439485		3.23348e-07
							267.576	0.443997		1.14097e-07
							268.015	0.439485		3.23348e-07
							268.448	0.432266		8.79831e-07
							268.878	0.43046		1.06172e-06
							269.315	0.436778		5.00046e-07
							269.759	0.443997		1.14097e-07
							270.229	0.470168		1.00248e-06
							270.729	0.499948		6.37522e-06
							271.215	0.485509		3.19035e-06
							271.71	0.495436		5.26273e-06
							272.217	0.507168		8.37713e-06
							272.751	0.533338		1.79208e-05
							273.322	0.57124		3.81002e-05
							273.861	0.538753		2.03433e-05
							274.368	0.507167		8.37683e-06
							274.854	0.486412		3.35753e-06
							275.325	0.47107		1.09703e-06
							275.792	0.466558		6.66734e-07
							276.25	0.458436		1.60785e-07
							276.697	0.44693		3.5238e-08
							277.135	0.438357		3.92315e-07
							277.568	0.432266		8.79831e-07
							278.017	0.449412		3.68785e-09
							278.486	0.469265		9.12102e-07
							278.973	0.486412		3.35753e-06
							279.475	0.501753		6.85011e-06
							279.996	0.521606		1.3199e-05
							280.507	0.510777		9.48011e-06
							280.987	0.480095		2.27754e-06
							281.455	0.468363		8.26081e-07
							281.912	0.456631		9.52516e-08
							282.355	0.443095		1.47405e-07
							282.786	0.430461		1.06161e-06
							283.211	0.425046		1.7093e-06
							283.627	0.416022		3.12975e-06
							284.449
							284.896	0.447607		2.34333e-08
							285.351	0.454827		4.67977e-08
							285.794	0.443094		1.47444e-07
							286.221	0.426851		1.47634e-06
							286.648	0.426851		1.47634e-06
							287.072	0.424144		1.8321e-06
							287.479	0.406997		4.97677e-06
							287.885	0.406096		5.18458e-06
							288.269	0.383534		1.17741e-05
							288.653	0.384436		1.14595e-05
							289.036	0.382632		1.20929e-05
							289.429	0.393461		8.54644e-06
							289.827	0.397973		7.24996e-06
							290.224	0.397071		7.50062e-06
							290.623	0.398875		7.00357e-06
							291.054	0.430461		1.06161e-06
							291.451	0.397071		7.50062e-06
							291.839	0.388046		1.02431e-05
							292.234	0.395266		8.015e-06
							292.63	0.396168		7.75582e-06
							293.035	0.40429		5.61391e-06
							293.43	0.395266		8.015e-06
							293.829	0.398876		7.0033e-06
							294.228	0.399778		6.76116e-06
							294.645	0.416924		2.96859e-06
							295.059	0.413314		3.63917e-06
							295.477	0.417827		2.81151e-06
							296.375
							297.142
							297.634	0.492729		4.64645e-06
							298.121	0.486863		3.44263e-06
							298.556	0.434521		6.767e-07
							298.972	0.416022		3.12975e-06
							299.412	0.440388		2.72939e-07
							299.9	0.488216		3.70431e-06
							300.392	0.491826		4.44941e-06
							300.852	0.460241		2.43377e-07
							301.295	0.442193		1.84972e-07
							301.737	0.442192		1.85016e-07
							302.201	0.463851		4.59733e-07
							302.704	0.503558		7.34206e-06
							303.189	0.484606		3.02744e-06
							303.679	0.490022		4.06853e-06
							304.168	0.489118		3.88408e-06
							304.638	0.470168		1.00248e-06
							305.095	0.456632		9.52831e-08
							305.534	0.439485		3.23348e-07
							305.944	0.409704		4.37799e-06
							306.342	0.397973		7.24996e-06
							306.743	0.401583		6.28942e-06
							307.157	0.413315		3.63898e-06
							307.6	0.443095		1.47405e-07
							308.039	0.439485		3.23348e-07
							308.49	0.450314		2.12498e-10
							308.975	0.485509		3.19035e-06
							309.495	0.519802		1.25368e-05
							310.01	0.515289		1.0955e-05
							310.525	0.514387		1.06516e-05
							311	0.475582		1.63391e-06
							311.453	0.453022		1.53701e-08
							311.868	0.415119		3.29535e-06
							312.271	0.402486		6.05982e-06
							312.7	0.429558		1.15895e-06
							313.185	0.484607		3.02762e-06
							313.679	0.493631		4.84754e-06
							314.179	0.499948		6.37522e-06
							314.634	0.455728		6.88679e-08
							315.058	0.424144		1.8321e-06
							315.473	0.414217
20240424_15	00:06:08	2024-04-24	3025		3.03	304.172			0.469449		6.46323e-05
							122.734
							123.23	0.496114		1.92161e-06
							123.738	0.507702		3.95475e-06
							124.234	0.496115		1.92176e-06
							124.726	0.491901		1.36235e-06
							125.21	0.483739		5.51867e-07
							125.691	0.481105		3.67166e-07
							126.173	0.482422		4.54828e-07
							126.651	0.478208		2.07329e-07
							127.127	0.475048		8.47123e-08
							127.606	0.479262		2.60232e-07
							128.097	0.490848		1.23756e-06
							128.598	0.501382		2.75591e-06
							129.102	0.503488		3.13141e-06
							129.612	0.510862		4.63513e-06
							130.117	0.504541		3.32815e-06
							130.624	0.506648		3.73981e-06
							131.129	0.505595		3.53108e-06
							131.628	0.499275		2.40422e-06
							132.13	0.501381		2.75574e-06
							132.621	0.491375		1.29927e-06
							133.107	0.486109		7.50108e-07
							133.599	0.491901		1.36235e-06
							134.092	0.492955		1.49327e-06
							134.573	0.480842		3.50783e-07
							135.062	0.489268		1.06155e-06
							135.543	0.480315		3.1908e-07
							136.018	0.475049		8.47425e-08
							136.492	0.474521		6.95146e-08
							136.961	0.469256		1.01164e-10
							137.435	0.473995		5.58428e-08
							137.907	0.471888		1.60714e-08
							138.372	0.465042		5.25021e-08
							138.833	0.460829		2.00845e-07
							139.287	0.453982		6.46602e-07
							139.744	0.457142		4.09389e-07
							140.201	0.457142		4.09389e-07
							140.656	0.455035		5.61559e-07
							141.112	0.455035		5.61559e-07
							141.568	0.456089		4.82438e-07
							142.024	0.456615		4.45199e-07
							142.484	0.459776		2.52908e-07
							142.942	0.457668		3.75143e-07
							143.399	0.457142		4.09389e-07
							143.846	0.447136		1.34565e-06
							144.291	0.445555		1.5431e-06
							144.729	0.437129		2.82328e-06
							145.17	0.441869		2.0559e-06
							145.617	0.446608		1.41009e-06
							146.07	0.452929		7.37638e-07
							146.51	0.440289		2.2982e-06
							146.953	0.442395		1.97823e-06
							147.394	0.440816		2.21588e-06
							147.84	0.446608		1.41009e-06
							148.289	0.448716		1.16183e-06
							148.737	0.448189		1.22164e-06
							149.176	0.438708		2.55416e-06
							149.618	0.442396		1.97808e-06
							150.058	0.439762		2.38202e-06
							150.506	0.447662		1.28296e-06
							150.956	0.450295		9.91605e-07
							151.401	0.445556		1.54297e-06
							151.841	0.439235		2.46734e-06
							152.278	0.437129		2.82328e-06
							152.719	0.441342		2.13522e-06
							153.165	0.446082		1.47578e-06
							153.609	0.443976		1.75378e-06
							154.051	0.441869		2.0559e-06
							154.491	0.440288		2.29835e-06
							154.932	0.440289		2.2982e-06
							155.37	0.438709		2.55399e-06
							155.813	0.442922		1.90191e-06
							156.256	0.442396		1.97808e-06
							156.713	0.457142		4.09389e-07
							157.172	0.459248		2.8127e-07
							157.625	0.453456		6.91327e-07
							158.071	0.445555		1.5431e-06
							158.52	0.448715		1.16194e-06
							158.968	0.448716		1.16183e-06
							159.42	0.451348		8.85576e-07
							159.874	0.454509		6.03291e-07
							160.333	0.458722		3.11023e-07
							160.787	0.453982		6.46602e-07
							161.231	0.443975		1.75392e-06
							161.678	0.447136		1.34565e-06
							162.151	0.472415		2.37686e-08
							162.624	0.473469		4.36665e-08
							163.093	0.468728		1.40681e-09
							163.559	0.466622		2.1607e-08
							164.023	0.463462		9.68914e-08
							164.484	0.460828		2.00891e-07
							164.946	0.461882		1.54775e-07
							165.41	0.463989		8.05858e-08
							165.874	0.463988		8.06153e-08
							166.339	0.465569		4.06974e-08
							166.798	0.459249		2.81215e-07
							167.247	0.448715		1.16194e-06
							167.715	0.468202		4.2059e-09
							174.538
							175.057	0.518762		6.57223e-06
							175.561	0.504344		3.29089e-06
							176.049	0.487754		9.05556e-07
							176.521	0.471888		1.60714e-08
							176.994	0.47281		3.05221e-08
							177.474	0.480447		3.2688e-07
							177.951	0.476563		1.36763e-07
							178.409	0.458179		3.43307e-07
							178.856	0.446822		1.38379e-06
							179.319	0.463199		1.0559e-07
							179.79	0.470835		5.18836e-09
							180.24	0.449769		1.04681e-06
							180.684	0.444831		1.63802e-06
							181.131	0.446148		1.46746e-06
							181.574	0.443284		1.85036e-06
							182.023	0.448979		1.13254e-06
							182.472	0.449077		1.12172e-06
							182.922	0.450625		9.57732e-07
							183.364	0.441737		2.07562e-06
							183.798	0.433969		3.40233e-06
							184.237	0.439235		2.46734e-06
							184.677	0.439104		2.48878e-06
							185.112	0.435812		3.05805e-06
							185.546	0.433311		3.5297e-06
							185.974	0.428834		4.45842e-06
							186.4	0.42541		5.24182e-06
							186.836	0.435681		3.08192e-06
							187.277	0.441342		2.13522e-06
							187.727	0.449637		1.0609e-06
							188.177	0.450822		9.37791e-07
							188.627	0.449374		1.08926e-06
							189.066	0.438873		2.52681e-06
							189.501	0.43578		3.06387e-06
							189.934	0.432915		3.60748e-06
							190.36	0.425937		5.11712e-06
							190.784	0.423831		5.62445e-06
							191.21	0.425806		5.14798e-06
							191.628	0.417642		7.25409e-06
							192.046	0.418432		7.03455e-06
							192.463	0.417248		7.36485e-06
							192.885	0.421855		6.12225e-06
							193.316	0.430678		4.06278e-06
							193.746	0.430677		4.06299e-06
							194.181	0.435022		3.20338e-06
							194.626	0.444634		1.66434e-06
							195.064	0.43805		2.66467e-06
							195.49	0.426201		5.05522e-06
							195.915	0.424719		5.40761e-06
							196.335	0.420177		6.56156e-06
							196.757	0.422119		6.05452e-06
							197.177	0.419288		6.80047e-06
							197.594	0.417775		7.21689e-06
							198.008	0.413363		8.50187e-06
							198.42	0.412441		8.78369e-06
							198.837	0.41705		7.42082e-06
							199.258	0.420276		6.53522e-06
							199.682	0.424621		5.43133e-06
							200.109	0.42699		4.87245e-06
							200.541	0.431665		3.85856e-06
							200.975	0.4341		3.37726e-06
							201.408	0.433508		3.49132e-06
							201.829	0.420605		6.44806e-06
							202.251	0.42179		6.13899e-06
							202.675	0.423831		5.62445e-06
							203.101	0.426464		4.99392e-06
							203.53	0.429097		4.40087e-06
							203.96	0.430151		4.17397e-06
							204.383	0.422777		5.88735e-06
							204.803	0.419749		6.67605e-06
							205.235	0.432389		3.7121e-06
							205.679	0.443975		1.75392e-06
							206.131	0.451349		8.85478e-07
							206.583	0.452139		8.09871e-07
							207.034	0.451085		9.11497e-07
							207.479	0.444897		1.62925e-06
							207.919	0.440552		2.25693e-06
							208.358	0.438907		2.5212e-06
							208.805	0.446674		1.40195e-06
							209.255	0.450197		1.00178e-06
							209.722	0.466589		2.21143e-08
							210.197	0.475443		9.70876e-08
							210.667	0.470177		1.43054e-09
							211.141	0.473863		5.26466e-08
							211.617	0.476102		1.19611e-07
							212.092	0.474654		7.32085e-08
							212.57	0.478208		2.07329e-07
							213.048	0.477418		1.71615e-07
							213.533	0.485632		7.07768e-07
							214.022	0.488494		9.80254e-07
							214.509	0.487228		8.5426e-07
							215.008	0.499011		2.36185e-06
							215.52	0.51194		4.87958e-06
							216.034	0.513865		5.33173e-06
							216.518	0.484265		5.93243e-07
							216.999	0.481171		3.71336e-07
							217.488	0.488544		9.85408e-07
							217.991	0.503751		3.17999e-06
							218.499	0.507702		3.95475e-06
							219.009	0.510203		4.48878e-06
							219.541	0.531664		1.04612e-05
							220.085	0.54391		1.49848e-05
							220.625	0.539828		1.33869e-05
							221.168	0.543514		1.48258e-05
							221.721	0.552468		1.86272e-05
							222.278	0.557076		2.07525e-05
							222.843	0.564975		2.46625e-05
							223.411	0.567774		2.6129e-05
							223.979	0.568235		2.63745e-05
							224.547	0.568531		2.65328e-05
							225.087	0.539975		1.34428e-05
							225.593	0.50604		3.61856e-06
							226.085	0.491835		1.35436e-06
							226.572	0.486866		8.19826e-07
							227.048	0.476019		1.16645e-07
							227.516	0.467922		6.30585e-09
							227.981	0.465174		4.94044e-08
							228.451	0.469979		7.57843e-10
							228.932	0.480414		3.24921e-07
							229.42	0.488972		1.03008e-06
							229.927	0.506385		3.68712e-06
							230.429	0.502171		2.89378e-06
							230.911	0.481896		4.18692e-07
							231.36	0.449505		1.07509e-06
							231.801	0.440157		2.31905e-06
							232.245	0.444765		1.64682e-06
							232.689	0.443844		1.772e-06
							233.132	0.442659		1.93981e-06
							233.574	0.441737		2.07562e-06
							234.023	0.449637		1.0609e-06
							234.502	0.47834		2.13626e-07
							235.003	0.501579		2.79002e-06
							235.529	0.525937		8.62389e-06
							236.034	0.5052		3.45433e-06
							236.498	0.46333		1.01211e-07
							236.94	0.442791		1.92074e-06
							237.374	0.433705		3.45315e-06
							237.8	0.426069		5.08612e-06
							238.224	0.424226		5.52747e-06
							238.639	0.414219		8.24434e-06
							239.046	0.407373		1.04148e-05
							239.461	0.415272		7.93297e-06
							239.888	0.426596		4.9633e-06
							240.329	0.440947		2.19565e-06
							240.786	0.456747		4.36089e-07
							241.244	0.458853		3.03473e-07
							241.72	0.47518		8.8754e-08
							242.2	0.480447		3.2688e-07
							242.656	0.45622		4.73024e-07
							243.097	0.441079		2.17536e-06
							243.528	0.430414		4.11829e-06
							243.949	0.421329		6.25832e-06
							244.364	0.415009		8.01018e-06
							244.779	0.414614		8.12683e-06
							245.19	0.411059		9.21472e-06
							245.596	0.405925		1.09064e-05
							246.001	0.405792		1.09521e-05
							246.406	0.404739		1.13174e-05
							246.819	0.412376		8.80373e-06
							247.229	0.410269		9.46575e-06
							247.638	0.409611		9.67741e-06
							248.038	0.399077		1.33846e-05
							248.443	0.405925		1.09064e-05
							248.856	0.41277		8.6826e-06
							249.28	0.423568		5.68948e-06
							249.702	0.422382		5.98742e-06
							250.14	0.437985		2.67571e-06
							250.584	0.443514		1.81797e-06
							251.014	0.430414		4.11829e-06
							251.438	0.423962		5.59219e-06
							251.862	0.423436		5.72227e-06
							252.276	0.414878		8.04877e-06
							252.688	0.411454		9.09047e-06
							253.097	0.409545		9.69877e-06
							253.511	0.413165		8.562e-06
							253.942	0.431138		3.96694e-06
							254.365	0.423304		5.75515e-06
							254.79	0.425345		5.25731e-06
							255.235	0.444173		1.72676e-06
							255.679	0.444371		1.69981e-06
							256.125	0.445752		1.51776e-06
							256.579	0.454509		6.03291e-07
							257.036	0.456747		4.36089e-07
							257.498	0.462047		1.48099e-07
							257.968	0.470341		2.14818e-09
							258.435	0.467149		1.43031e-08
							258.91	0.474653		7.31803e-08
							259.829
							260.29	0.461091		1.88822e-07
							260.763	0.472679		2.81888e-08
							261.236	0.4736		4.65592e-08
							261.708	0.471889		1.60846e-08
							262.191	0.482421		4.54758e-07
							262.677	0.486372		7.73978e-07
							263.163	0.485977		7.38268e-07
							263.656	0.492823		1.47655e-06
							264.144	0.488215		9.51744e-07
							264.629	0.484989		6.5264e-07
							265.141	0.51231		4.96493e-06
							268.499	3.35819		0.0225536
							269.034	0.535022		1.1621e-05
							269.539	0.504805		3.37841e-06
							270.037	0.497695		2.15624e-06
							270.546	0.508623		4.14747e-06
							271.066	0.52021		6.96387e-06
							271.599	0.533113		1.09542e-05
							272.135	0.536602		1.21877e-05
							272.671	0.536009		1.19734e-05
							273.226	0.554048		1.9343e-05
							273.783	0.557076		2.07525e-05
							274.358	0.575706		3.05147e-05
							274.906	0.548057		1.67004e-05
							275.415	0.509084		4.24566e-06
							275.913	0.497103		2.0668e-06
							276.413	0.500591		2.62107e-06
							276.9	0.487228		8.5426e-07
							277.378	0.477813		1.8905e-07
							277.858	0.479525		2.74368e-07
							278.335	0.476826		1.47063e-07
							278.82	0.485647		7.09081e-07
							279.321	0.500395		2.58818e-06
							279.834	0.513428		5.22733e-06
							280.322	0.487689		8.99136e-07
							280.783	0.461421		1.74206e-07
							281.268	0.484528		6.14492e-07
							281.703	0.435549		3.10606e-06
							282.127	0.423436		5.72227e-06
							282.548	0.42146		6.2243e-06
							282.971	0.422778		5.8871e-06
							283.385	0.414087		8.28379e-06
							283.809	0.423831		5.62445e-06
							284.267	0.458392		3.30453e-07
							284.719	0.451349		8.85478e-07
							285.169	0.450822		9.37791e-07
							285.592	0.422514		5.95389e-06
							286.006	0.414285		8.22465e-06
							286.418	0.411388		9.11117e-06
							286.833	0.415207		7.95202e-06
							287.26	0.427254		4.81205e-06
							287.689	0.429295		4.35779e-06
							288.12	0.430743		4.04916e-06
							288.559	0.438709		2.55399e-06
							288.995	0.43647		2.93958e-06
							289.452	0.456286		4.68316e-07
							289.934	0.482554		4.64132e-07
							290.403	0.468531		2.27997e-09
							290.861	0.458063		3.5041e-07
							291.319	0.457866		3.6264e-07
							291.782	0.463791		8.65359e-08
							292.266	0.483805		5.56976e-07
							292.776	0.510005		4.44527e-06
							293.302	0.526003		8.64406e-06
							293.817	0.515206		5.65854e-06
							294.327	0.509414		4.31666e-06
							294.835	0.507964		4.00911e-06
							295.322	0.487557		8.86169e-07
							295.806	0.483343		5.21703e-07
							296.293	0.487557		8.86169e-07
							296.762	0.468926		7.40598e-10
							297.224	0.461619		1.6572e-07
							297.684	0.460302		2.26152e-07
							298.153	0.468926		7.40598e-10
							298.611	0.457668		3.75143e-07
							299.062	0.451744		8.47253e-07
							299.503	0.441013		2.18549e-06
							299.945	0.441539		2.10539e-06
							300.373	0.427715		4.70748e-06
							300.798	0.425608		5.1948e-06
							301.231	0.433048		3.58126e-06
							301.677	0.44595		1.4925e-06
							302.131	0.453455		6.91414e-07
							302.605	0.473864		5.26705e-08
							303.132	0.527122		8.98952e-06
							303.683	0.550953		1.79536e-05
							304.172	0.489532
20240424_11	00:05:15	2024-04-24	3024	2	1.88	193.066	111.63		0.516262		9.23058e-06
							112.196	0.566277		1.0736e-05
							112.714	0.517546		7.07488e-09
							113.227	0.513033		4.47509e-08
							113.726	0.499497		1.2063e-06
							114.237	0.510777		1.29125e-07
							114.758	0.521155		1.0275e-07
							115.281	0.522509		1.67485e-07
							115.793	0.512582		5.81245e-08
							116.301	0.507168		3.54946e-07
							116.808	0.507619		3.20613e-07
							117.308	0.499497		1.2063e-06
							118.313
							118.926	0.612527		3.97723e-05
							119.428	0.502204		8.48196e-07
							119.916	0.487765		3.48534e-06
							120.919
							121.44	0.520704		8.46809e-08
							121.976	0.536496		1.75713e-06
							122.504	0.527698		5.61289e-07
							123.045	0.540783		2.58058e-06
							123.561	0.516192		2.10791e-11
							125.234
							125.727	0.492729		2.37685e-06
							126.225	0.497692		1.48003e-06
							126.808	0.583648		1.94887e-05
							127.437	0.62832		5.38926e-05
							127.965	0.5286		6.53323e-07
							128.482	0.516417		1.03003e-10
							129.538
							130.098	0.55996		8.19531e-06
							130.599	0.501076		9.89773e-07
							131.103	0.504686		5.75132e-07
							131.601	0.497241		1.5528e-06
							132.102	0.501301		9.60661e-07
							132.624	0.522058		1.44175e-07
							133.128	0.504009		6.44369e-07
							133.671	0.542814		3.02577e-06
							134.216	0.545069		3.56154e-06
							134.714	0.498144		1.40886e-06
							135.214	0.499722		1.17414e-06
							135.727	0.513259		3.8706e-08
							136.245	0.517771		9.77182e-09
							136.737	0.492278		2.46882e-06
							137.203	0.466106		1.07967e-05
							137.657	0.453699		1.67989e-05
							138.106	0.448735		1.95704e-05
							138.554	0.448509		1.97016e-05
							139.019	0.464753		1.13871e-05
							139.494	0.475132		7.26044e-06
							139.966	0.471747		8.50469e-06
							140.442	0.476259		6.86801e-06
							140.926	0.483478		4.61286e-06
							141.467	0.541912		2.82368e-06
							141.957	0.48957		3.0578e-06
							142.449	0.4916		2.61038e-06
							142.949	0.500174		1.11084e-06
							143.459	0.509875		1.75085e-07
							144.958
							145.454	0.495718		1.81141e-06
							145.936	0.481561		5.16809e-06
							146.405	0.469491		9.38856e-06
							171.44
							172.042	0.602148		3.16583e-05
							172.631	0.589289		2.28881e-05
							173.201	0.569887		1.23418e-05
							173.743	0.542137		2.87344e-06
							174.326	0.582972		1.90996e-05
							174.942	0.615459		4.22319e-05
							175.498	0.556576		6.97516e-06
							176.044	0.54507		3.56179e-06
							177.087
							177.618	0.531082		9.42618e-07
							178.222	0.603277		3.24961e-05
							179.011
							179.721
							180.502
							181.18
							181.924
							182.681
							183.425
							184.266
							184.999
							185.655
							186.276
							186.902
							187.546
							188.119	0.573045		1.38382e-05
							188.728	0.608692		3.66665e-05
							189.357	0.628996		5.45448e-05
							189.881	0.523862		2.47892e-07
							190.382	0.501302		9.60532e-07
							190.909	0.527021		4.968e-07
							191.424	0.514726		1.01268e-08
							199.544
							200.073	0.529672		7.71785e-07
							200.541	0.467461		1.02212e-05
							200.982	0.441064		2.42693e-05
							201.413	0.430686		3.14303e-05
							201.871	0.458211		1.44632e-05
							202.309	0.437906		2.63505e-05
							202.736	0.427528		3.37929e-05
							203.148	0.41196		4.66907e-05
							203.568	0.419632		4.00746e-05
							203.985	0.417375		4.19685e-05
							204.42	0.435199		2.82027e-05
							204.869	0.448509		1.97016e-05
							205.341	0.471747		8.50469e-06
							205.848	0.507168		3.54946e-07
							206.405	0.557478		7.29078e-06
							206.967	0.561765		8.88633e-06
							207.488	0.520929		9.34769e-08
							207.975	0.486863		3.70947e-06
							208.449	0.474003		7.66451e-06
							208.9	0.450766		1.84109e-05
							210.191
							211.057
							211.928
							212.843
							213.738
							214.279	0.541686		2.77414e-06
							214.788	0.508521		2.57186e-07
							215.322	0.53424		1.38715e-06
							215.907	0.585228		2.04133e-05
							216.432	0.524991		3.27013e-07
							216.926	0.493857		2.15445e-06
							217.427	0.50085		1.01945e-06
							217.958	0.530969		9.28298e-07
							218.487	0.529165		7.14529e-07
							219.017	0.529954		8.04586e-07
							219.527	0.509875		1.75085e-07
							220.032	0.505137		5.31191e-07
							220.545	0.512582		5.81245e-08
							221.041	0.496564		1.6653e-06
							221.555	0.513484		3.31233e-08
							222.107	0.552741		5.71121e-06
							222.703	0.596057		2.73272e-05
							223.224	0.520253		6.83581e-08
							223.714	0.490021		2.95534e-06
							224.182	0.468363		9.84688e-06
							224.691	0.509424		2.00684e-07
							225.276	0.584776		2.01466e-05
							225.891	0.615009		4.18496e-05
							226.453	0.561765		8.88633e-06
							226.978	0.524765		3.10299e-07
							227.515	0.536947		1.83633e-06
							228.053	0.538753		2.17099e-06
							228.581	0.527924		5.83692e-07
							229.131	0.549581		4.76459e-06
							229.668	0.536948		1.83651e-06
							230.244	0.576204		1.54207e-05
							230.786	0.541911		2.82346e-06
							231.95
							232.536	0.586582		2.12227e-05
							233.096	0.559283		7.94335e-06
							233.633	0.53785		2.00016e-06
							234.137	0.504009		6.44369e-07
							234.632	0.494534		2.02622e-06
							235.132	0.500399		1.07999e-06
							235.652	0.520027		6.08352e-08
							236.159	0.506942		3.72807e-07
							236.656	0.496338		1.70373e-06
							237.823
							238.375	0.551613		5.36347e-06
							238.875	0.499496		1.20644e-06
							239.368	0.49318		2.28662e-06
							239.892	0.524088		2.62854e-07
							240.459	0.566954		1.10286e-05
							241.628
							242.178	0.550484		5.02635e-06
							242.693	0.514613		1.16715e-08
							243.192	0.49882		1.30569e-06
							243.714	0.522058		1.44175e-07
							244.245	0.531758		1.03057e-06
							244.791	0.545521		3.67418e-06
							245.293	0.502205		8.48075e-07
							245.762	0.468588		9.75458e-06
							246.224	0.462046		1.26154e-05
							246.771	0.546875		4.02211e-06
							247.554
							248.101	0.547777		4.26262e-06
							248.576	0.474229		7.58275e-06
							249.026	0.449863		1.89221e-05
							249.482	0.456631		1.52612e-05
							249.933	0.451217		1.81582e-05
							250.393	0.459338		1.39071e-05
							250.885	0.492278		2.46882e-06
							251.355	0.470168		9.11873e-06
							251.785	0.429558		3.22644e-05
							252.224	0.439485		2.52992e-05
							259.174
							259.746	0.571579		1.31329e-05
							260.306	0.560411		8.36535e-06
							260.858	0.551387		5.29511e-06
							261.388	0.530179		8.31247e-07
							261.916	0.528375		6.29712e-07
							262.565	0.648399		7.49363e-05
							263.025	0.460692		1.32534e-05
							263.816	0.790757		0.00032338
							264.346	0.529954		8.04586e-07
							264.853	0.507168		3.54946e-07
							265.366	0.512582		5.81245e-08
							265.879	0.513484		3.31233e-08
							266.4	0.520253		6.83581e-08
							266.883	0.483704		4.54948e-06
							267.352	0.468814		9.66232e-06
							267.822	0.470168		9.11873e-06
							268.299	0.476936		6.63751e-06
							268.771	0.471522		8.59088e-06
							269.248	0.476936		6.63751e-06
							269.726	0.477838		6.33652e-06
							270.207	0.481448		5.2018e-06
							270.695	0.488217		3.37565e-06
							271.175	0.480094		5.61429e-06
							271.654	0.47829		6.18832e-06
							272.133	0.479192		5.89782e-06
							272.617	0.483704		4.54948e-06
							273.106	0.489119		3.162e-06
							273.602	0.49679		1.6273e-06
							274.107	0.504911		5.52992e-07
							274.602	0.494534		2.02622e-06
							275.571
							276.061	0.489344		3.1098e-06
							276.562	0.500851		1.01932e-06
							277.073	0.511228		1.08764e-07
							277.601	0.528375		6.29712e-07
							278.134	0.533338		1.25145e-06
							278.642	0.507619		3.20613e-07
							279.14	0.498143		1.40902e-06
							279.644	0.504009		6.44369e-07
							280.155	0.510326		1.51232e-07
							280.668	0.513485		3.30995e-08
							281.186	0.517997		1.29182e-08
							281.717	0.531082		9.42618e-07
							282.22	0.503106		7.42843e-07
							282.717	0.49679		1.6273e-06
							286.14
							286.821	0.680434		0.000115676
							287.391	0.569887		1.23418e-05
							287.915	0.524765		3.10299e-07
							288.435	0.51935		4.09238e-08
							288.961	0.526119		4.16991e-07
							289.505	0.543716		3.23484e-06
							290.025	0.520704		8.46809e-08
							290.541	0.51529		4.05555e-09
							291.03	0.48957		3.0578e-06
							291.516	0.485509		4.05902e-06
							292.067	0.551387		5.29511e-06
							292.632	0.564697		1.00684e-05
							293.179	0.547101		4.08171e-06
							293.699	0.520252		6.83238e-08
							294.197	0.497692		1.48003e-06
							294.698	0.501302		9.60532e-07
							295.19	0.491826		2.56276e-06
							295.971
							296.536	0.565375		1.03523e-05
							297.008	0.471972		8.41893e-06
							297.51	0.501753		9.03491e-07
							298.019	0.508522		2.5712e-07
							298.586	0.567179		1.11267e-05
							299.146	0.560411		8.36535e-06
							299.69	0.543265		3.12943e-06
							300.218	0.528826		6.77477e-07
							300.731	0.513033		4.47509e-08
							301.251	0.519125		3.51773e-08
							302.399
							302.937	0.53785		2.00016e-06
							303.502	0.565375		1.03523e-05
							304.074	0.571691		1.31861e-05
							304.696
20240424_11	00:02:00	2024-04-24	3025	9	4.96	86.8168	28.8032		0.416106		5.93929e-06
							29.1942	0.391063		4.26636e-06
							29.972
							30.3733	0.401245		1.50239e-06
							30.7732	0.399864		1.79459e-06
							31.1785	0.405387		7.81621e-07
							31.5838	0.405214		8.07054e-07
							32.0038	0.420056		1.06136e-07
							32.4528	0.448963		7.34407e-06
							32.8687	0.415957		1.51151e-10
							33.2493	0.380579		8.5862e-06
							33.6271	0.377817		9.97314e-06
							34.013	0.385843		6.23029e-06
							34.3953	0.382304		7.77265e-06
							34.791	0.395722		2.8266e-06
							35.1958	0.404826		8.65577e-07
							35.6301	0.434273		2.24515e-06
							36.0628	0.432697		1.87251e-06
							36.5583	0.495537		4.29202e-05
							37.0139	0.455608		1.0615e-05
							37.4735	0.459576		1.28547e-05
							37.9597	0.486154		3.3379e-05
							38.3991	0.439384		3.68614e-06
							38.8298	0.430756		1.46e-06
							39.2671	0.437314		3.05971e-06
							39.6882	0.421091		1.69045e-07
							40.092	0.403834		1.02451e-06
							40.5131	0.421092		1.69113e-07
							40.9259	0.412807		7.40395e-08
							41.3629	0.436969		2.96097e-06
							41.8786	0.515664		6.74271e-05
							42.3873	0.508762		5.84022e-05
							42.8899	0.502548		5.08314e-05
							47.2418
							47.6746	0.432827		1.90197e-06
							48.0949	0.420229		1.15637e-07
							48.509	0.414188		2.50269e-08
							48.9267	0.41764		1.60066e-08
							49.3443	0.41764		1.60066e-08
							49.7709	0.426614		7.51135e-07
							50.1962	0.425233		5.66674e-07
							51.0166
							51.4591	0.442491		4.73582e-06
							51.9195	0.46044		1.33707e-05
							52.7937
							53.1802	0.386576		5.93214e-06
							53.5397	0.35948		2.1813e-05
							54.2732
							55.0054
							55.3746	0.369146		1.50017e-05
							55.7513	0.376739		1.05426e-05
							56.5082
							56.9174	0.409183		3.26046e-07
							57.329	0.4116		1.38126e-07
							57.7232	0.394169		3.27371e-06
							58.108	0.38485		6.64586e-06
							58.5145	0.406422		6.37966e-07
							58.93	0.415569		1.96214e-09
							59.3378	0.407803		4.68985e-07
							59.7373	0.399519		1.87164e-06
							60.125	0.387612		5.52321e-06
							60.5005	0.37553		1.12001e-05
							60.8884	0.387957		5.39027e-06
							61.2705	0.382089		7.87184e-06
							61.6592	0.388646		5.12963e-06
							62.0289	0.36975		1.46183e-05
							62.4606	0.431705		1.65528e-06
							62.8752	0.414533		1.68335e-08
							63.2507	0.375531		1.11996e-05
							67.8054
							68.2917	0.486326		3.35431e-05
							68.7687	0.477007		2.52308e-05
							69.2071	0.438349		3.36563e-06
							69.6378	0.430756		1.46e-06
							70.0738	0.435933		2.6742e-06
							70.5242	0.45043		8.01451e-06
							70.9532	0.42903		1.13625e-06
							71.3664	0.413153		5.93236e-08
							71.7657	0.399347		1.91065e-06
							72.1765	0.410736		1.96174e-07
							72.5903	0.413843		3.48398e-08
							73.0142	0.423853		4.08266e-07
							73.4384	0.424198		4.45439e-07
							73.8482	0.409874		2.64208e-07
							74.2465	0.398311		2.15418e-06
							74.6607	0.414188		2.50269e-08
							75.0747	0.414016		2.97167e-08
							75.4932	0.418503		3.90838e-08
							75.915	0.421782		2.19158e-07
							76.3461	0.431101		1.52958e-06
							76.7689	0.422817		3.06372e-07
							77.1773	0.408321		4.12294e-07
							77.5835	0.406249		6.60964e-07
							78.0039	0.420401		1.25486e-07
							78.4356	0.431705		1.65528e-06
							78.7974	0.361811		2.00541e-05
							79.3302	0.53275		9.25565e-05
							79.7772	0.446978		6.48351e-06
							80.2245	0.447324		6.62966e-06
							80.6615	0.436968		2.96068e-06
							81.1043	0.442837		4.86084e-06
							81.5454	0.44111		4.25304e-06
							81.9646	0.419193		6.48244e-08
							82.3838	0.419193		6.48244e-08
							82.8083	0.424543		4.84231e-07
							83.238	0.429721		1.261e-06
							83.6605	0.422472		2.75681e-07
							84.1006	0.440075		3.90823e-06
							84.5421	0.441456		4.37156e-06
							84.9379	0.395895		2.77882e-06
							85.7378
							86.1284	0.390545		4.44468e-06
							86.55	0.421609		2.06002e-07
							86.9666	0.416605		1.69347e-09
							87.3654	0.398828		2.03083e-06
							87.7539	0.388475		5.19371e-06
							88.1443	0.390372		4.50505e-06
							88.5459	0.40159		1.43344e-06
							88.9361	0.3902		4.56547e-06
							89.3171	0.381053		8.35862e-06
							89.6918	0.374668		1.1681e-05
							90.0716	0.379845		8.94466e-06
							90.4565	0.38485		6.64586e-06
							90.8521	0.395636		2.8505e-06
							91.6217
							92.2145
							92.3745
							92.7533	0.37881		9.46256e-06
							93.128	0.374668		1.1681e-05
							93.5089	0.380881		8.44085e-06
							95.7643
							96.179	0.414706		1.33345e-08
							96.563	0.383987		7.01792e-06
							96.973	0.410046		2.49825e-07
							97.4081	0.435071		2.44673e-06
							97.852	0.443871		5.24416e-06
							98.2745	0.422473		2.75768e-07
							99.4941
							99.8881	0.393996		3.32554e-06
							100.297	0.409184		3.25952e-07
							100.543
							101.102
							101.507	0.405387		7.81621e-07
							101.911	0.403834		1.02451e-06
							102.759
							103.178	0.418157		2.86146e-08
							103.584	0.406423		6.37835e-07
							104.391
							104.808	0.41695		4.84512e-09
							105.221	0.413325		5.26143e-08
							106.069
							106.497	0.428167		9.89566e-07
							106.934	0.436796		2.91207e-06
							107.36	0.425751		6.32822e-07
							107.784	0.424543		4.84231e-07
							108.191	0.406422		6.37966e-07
							108.604	0.413153		5.93236e-08
							108.986	0.382434		7.71298e-06
							111.929
							112.366	0.436796		2.91207e-06
							112.789	0.42368		3.90235e-07
							113.195	0.40556		7.56595e-07
							113.6	0.405214		8.07054e-07
							114.007	0.40694		5.71542e-07
							114.405	0.397621		2.32447e-06
							114.814	0.409701		2.7908e-07
							115.226	0.411945		1.17785e-07
							115.62	0.393651
20240424_11	00:02:00	2024-04-24	3025	9	4.39	74.2074	29.5025		0.477564	7.60223e-08	4.04565e-05
							29.9833	0.480803		1.12683e-08
							30.4596	0.476317		2.72165e-08
							30.9352	0.475626		3.24416e-07
							31.4195	0.484255		8.37421e-09
							31.896	0.476489		1.83658e-08
							32.3719	0.475972		1.03428e-06
							32.8375	0.465617		3.41309e-07
							33.322	0.484427		1.01419e-05
							33.8369	0.514975		1.08069e-05
							34.3531	0.516182		1.55099e-06
							34.8453	0.492194		2.14826e-06
							35.3401	0.494782		3.7488e-05
							35.8896	0.54949		3.38481e-05
							36.4355	0.545909		6.0025e-06
							36.9418	0.506345		3.07656e-06
							37.44	0.498169		3.03902e-07
							37.9241	0.48404		5.15086e-07
							38.3932	0.469133		1.37372e-07
							38.8664	0.47321		2.60956e-07
							39.35	0.483565		1.29303e-05
							39.8698	0.519806		2.935e-05
							40.411	0.541206		4.03731e-06
							40.9121	0.501168		1.32432e-07
							41.394	0.481839		0.00165266
							42.2379			7.06922e-07
							42.7056	0.467687
							43.3773	0.671741		1.06686e-07
							43.851	0.473727		1.06815e-06
							44.3165	0.465423		6.22097e-08
							44.7911	0.474634		3.77588e-06
							45.2915	0.500391		2.07766e-05
							45.8226	0.53111		1.02823e-05
							46.3378	0.515233		5.34695e-07
							46.824	0.486154		4.70823e-08
							47.3041	0.480113		1.52818e-06
							47.7962	0.492086		5.77084e-07
							48.2827	0.486488		2.87543e-08
							48.7582	0.475572		6.01127e-07
							49.2449	0.486672		0.00165266
							50.2849
							50.774	0.489087		1.84362e-07
							51.2465	0.47252		0.00165266
							52.6344
							53.0907	0.456297		2.21135e-06
							53.5508	0.460095		2.12512e-06
							54.0112	0.460439		1.6422e-06
							54.4737	0.46251		6.25411e-06
							54.9219	0.448186		1.1143e-05
							55.3602	0.43835		6.62695e-06
							55.8076	0.447323		1.1891e-06
							56.2723	0.464754		1.17448e-06
							56.7626	0.490295		2.55353e-06
							57.2589	0.496336		2.72165e-08
							57.7346	0.475626		3.84786e-07
							58.2049	0.470277		8.09142e-07
							58.6718	0.466997		4.22194e-07
							59.1418	0.469931		1.35472e-06
							59.6057	0.463891		1.45931e-06
							60.069	0.463373		1.87577e-06
							60.5305	0.461475		5.75036e-06
							60.9799	0.449394		8.65253e-06
							61.4229	0.443009		3.01654e-06
							61.8801	0.457161		1.661e-08
							62.3592	0.479078		2.57671e-06
							62.8556	0.496421		8.39657e-08
							63.3297	0.47416		1.03428e-06
							63.7954	0.465617		1.6422e-06
							64.2579	0.46251		2.67019e-06
							64.7162	0.458368		8.35698e-07
							65.1831	0.466825		1.9985e-06
							65.644	0.460957		9.7541e-07
							66.11	0.465962		2.19164e-06
							66.6049	0.494955		1.75017e-05
							67.1316	0.526709		6.95657e-07
							67.619	0.487362		1.01414e-05
							68.134	0.514974		7.97766e-08
							68.6082	0.474246		1.79619e-06
							69.07	0.46182		4.18366e-06
							69.5236	0.453536		3.6042e-06
							69.9788	0.455262		3.94649e-06
							70.4331	0.454227		1.71833e-06
							70.8952	0.462165		7.06922e-07
							71.3629	0.467687		1.12683e-08
							71.8392	0.476317		6.47393e-07
							72.3263	0.487016		1.83658e-08
							72.8022	0.475972		2.2116e-06
							73.2623	0.460094		5.33518e-06
							73.7128	0.45043		5.06729e-06
							74.1639	0.45112		1.25402e-06
							74.6283	0.464409		8.37421e-09
							75.1048	0.476489		4.71336e-07
							75.5743	0.469499		9.18325e-06
							76.0874	0.513163		1.88796e-05
							76.616	0.528607
							79.7338
							80.2599	0.526019		5.47171e-06
							80.7099	0.450085		5.26775e-06
							81.1605	0.450602		8.73888e-06
							81.6034	0.442837		3.88853e-06
							82.0578	0.454399		4.93593e-06
							82.5092	0.451465		3.22433e-06
							82.9657	0.45647		1.1891e-06
							83.4305	0.464754		2.50424e-08
							83.9099	0.479423		1.91297e-07
							84.3926	0.482702		3.24416e-07
							84.8769	0.484255		5.88785e-07
							85.3454	0.46855		8.90255e-07
							85.8119	0.46648		9.7541e-07
							86.2778	0.465962		1.03428e-06
							86.7435	0.465617		3.27743e-06
							87.1998	0.456297		2.71826e-06
							87.658	0.458196		3.88853e-06
							88.1124	0.454399		6.01154e-05
							88.681	0.568646		1.28876e-06
							89.1719	0.4909		7.19286e-07
							89.6395	0.467601		4.8063e-06
							90.0913	0.45181		3.06791e-06
							90.5483	0.456988		8.09142e-07
							91.0153	0.466997
							91.9846			3.57919e-07
							92.4551	0.470536		1.85506e-08
							92.9343	0.479164		2.5048e-06
							93.3933	0.458972		4.72153e-07
							93.8789	0.485636		3.92015e-06
							94.3797	0.500823		4.46346e-05
							94.9358	0.556047		1.84362e-07
							95.4083	0.47252		1.9985e-06
							95.8692	0.460957		5.88654e-07
							96.3378	0.468551		1.11347e-09
							96.8157	0.477956		6.43539e-10
							97.293	0.477266		1.91633e-06
							97.7543	0.461302		3.88853e-06
							98.2087	0.454399		5.26736e-06
							98.6593	0.450603
							99.604			2.00356e-06
							100.065	0.460936		6.79425e-07
							100.533	0.467881		1.12683e-08
							101.009	0.476317		2.9659e-06
							101.466	0.457333		1.32984e-05
							101.901	0.434725		2.131e-05
							102.325	0.423335		1.84581e-06
							102.786	0.461604		3.64602e-06
							103.241	0.455133		5.88785e-07
							103.71	0.46855
20240424_11	00:02:00	2024-04-24	3025	9	5.05	31.1699	84.1869		0.857865		5.07827e-05
							85.6134
							86.7638
							87.7926
							88.763
							89.7101	0.94711		0.000256923
							90.6444	0.93434		0.000188657
							91.5585	0.914105		0.000102029
							92.4779	0.919369		0.000122023
							93.375	0.897063		4.95632e-05
							94.2593	0.884292		2.25281e-05
							95.1486	0.889297		3.18694e-05
							96.0263	0.877734		1.27344e-05
							96.9318	0.905519		7.32541e-05
							97.8254	0.893611		4.12179e-05
							98.6897	0.864273		1.32448e-06
							99.5564	0.866689		2.51154e-06
							100.4	0.843391		6.75823e-06
							101.251	0.851157		1.45165e-06
							102.111	0.859786		1.19004e-07
							102.953	0.842183		7.93336e-06
							103.795	0.841665		8.46611e-06
							104.636	0.841148		9.01509e-06
							105.482	0.84598		4.55678e-06
							106.331	0.849431		2.29475e-06
							107.16	0.828894		2.70753e-05
							108.012	0.85202		1.10217e-06
							108.862	0.849776		2.11086e-06
							109.676	0.81388		6.24099e-05
							110.505	0.829067		2.6753e-05
							111.331	0.826479		3.17774e-05
							112.16	0.828376		2.80522e-05
							112.963	0.803871		9.40446e-05
							113.751	0.787993		0.000157488
							114.549	0.797658		0.000116933
							115.357	0.807667		8.12861e-05
20240424_18	00:02:00	2024-04-24	3025	9	5.4	73.373	94.4515		0.440084		2.01371e-05
							95.2296
							95.6338	0.404262		9.72115e-06
							95.9997	0.365879		4.17146e-05
							96.4116	0.411885		6.02398e-06
							96.8548	0.443191		7.31479e-08
							97.2895	0.434753		2.15273e-07
							97.6979	0.408346		7.63091e-06
							98.106	0.408074		7.76226e-06
							98.5181	0.412157		5.90832e-06
							98.9346	0.416513		4.20891e-06
							99.3446	0.40998		6.86538e-06
							99.732	0.387384		2.10398e-05
							100.107	0.375134		3.1958e-05
							100.47	0.362883		4.51511e-05
							100.836	0.366423		4.11053e-05
							101.213	0.376223		3.08953e-05
							101.6	0.387656		2.08232e-05
							101.994	0.393374		1.65287e-05
							102.359	0.365061		4.26394e-05
							102.728	0.369145		3.81234e-05
							103.106	0.377856		2.93355e-05
							103.487	0.381396		2.60927e-05
							103.89	0.402901		1.04739e-05
							104.298	0.408346		7.63091e-06
							104.71	0.411885		6.02398e-06
							105.103	0.392829		1.69167e-05
							105.498	0.394735		1.55796e-05
							105.896	0.397729		1.35903e-05
							106.271	0.37527		3.18243e-05
							106.638	0.36758		3.98241e-05
							107.006	0.367851		3.9527e-05
							107.376	0.369435		3.78124e-05
							107.761	0.384917		2.30558e-05
							108.156	0.395551		1.50239e-05
							108.539	0.382722		2.4927e-05
							108.93	0.391587		1.78176e-05
							109.332	0.401813		1.10958e-05
							109.726	0.393527		1.64206e-05
							110.128	0.401846		1.10767e-05
							110.556	0.428389		1.0361e-06
							110.978	0.421788		2.53584e-06
							111.403	0.424884		1.75023e-06
							111.817	0.414267		5.04924e-06
							112.226	0.408754		7.43597e-06
							112.647	0.421141		2.71837e-06
							113.062	0.414608		4.91674e-06
							113.487	0.425871		1.5303e-06
							113.89	0.403071		1.03783e-05
							114.31	0.41978		3.12302e-06
							114.742	0.431486		5.59999e-07
							115.177	0.435297		1.73577e-07
							115.666	0.488926		1.80725e-05
							116.55
							116.943	0.392829		1.69167e-05
							117.334	0.391331		1.80062e-05
							117.732	0.398002		1.34157e-05
							118.129	0.396912		1.41196e-05
							118.522	0.393373		1.65294e-05
							118.916	0.393918		1.6146e-05
							119.336	0.419236		3.29262e-06
							119.749	0.41379		5.23755e-06
							120.169	0.41978		3.12302e-06
							120.615	0.44537		2.11707e-07
							121.102	0.487837		1.72756e-05
							121.528	0.425224		1.6728e-06
							121.945	0.417875		3.73655e-06
							122.397	0.451358		9.62959e-07
							122.845	0.448364		5.19424e-07
							123.278	0.433119		3.67474e-07
							123.724	0.445914		2.57521e-07
							124.176	0.451359		9.6313e-07
							124.621	0.445369		2.11627e-07
							125.039	0.417602		3.82898e-06
							126.73
							127.125	0.395142		1.53012e-05
							127.525	0.400724		1.17362e-05
							127.911	0.386023		2.21406e-05
							128.319	0.407257		8.16356e-06
							128.74	0.420869		2.797e-06
							129.648
							132.293
							132.956
							133.504
							134.074
							134.596	0.522139		5.10082e-05
							135.668
							136.173	0.505261		3.21825e-05
							136.647	0.474226		8.83105e-06
							137.118	0.470959		7.22187e-06
							137.575	0.456259		1.98213e-06
							138.029	0.45408		1.48407e-06
							140.922
							141.405	0.482937		1.39122e-05
							141.891	0.48566		1.57364e-05
							142.37	0.478582		1.12282e-05
							142.847	0.477765		1.07567e-05
							143.415	0.567873		0.000123713
							143.957	0.542011		7.87059e-05
							144.436	0.478582		1.12282e-05
							144.89	0.454353		1.54253e-06
							145.356	0.466059		5.1115e-06
							145.714	0.358256		5.07255e-05
							146.277	0.562156		0.000112891
							146.739	0.461976		3.63087e-06
							147.308	0.568962		0.00012583
							147.919	0.61143		0.000222421
							148.435	0.516422		4.4148e-05
							148.908	0.47232		7.87258e-06
							149.375	0.467693		5.77481e-06
							149.825	0.449997		7.44501e-07
							150.29	0.46497		4.69189e-06
							150.77	0.479943		1.20361e-05
							151.281	0.51016		3.72022e-05
							151.771	0.490832		1.95106e-05
							152.227	0.455443		1.78719e-06
							152.675	0.448636		5.54109e-07
							153.157	0.481848		1.32141e-05
							153.658	0.50036		2.75245e-05
							154.168	0.510161		3.72033e-05
							154.671	0.503354		3.03268e-05
							155.157	0.485388		1.55491e-05
							155.625	0.468509		6.12121e-06
							156.09	0.464698		4.58989e-06
							156.583	0.493554		2.16597e-05
							157.126	0.542556		7.95498e-05
							157.636	0.51016		3.72022e-05
							158.104	0.468237		6.00462e-06
							158.566	0.461431		3.45234e-06
							159.026	0.46007		3.02616e-06
							160.058
							160.727
							161.241	0.5137		4.10558e-05
							161.68	0.438836		1.1793e-08
							162.105	0.425496		1.61212e-06
							162.582	0.476949		1.02959e-05
							163.047	0.464425		4.48864e-06
							163.508	0.461159		3.36492e-06
							164.435
							164.951	0.515877		4.35199e-05
							165.535	0.583391		0.000155583
							166.047	0.512066		3.92535e-05
							166.49	0.442919		6.09024e-08
							166.925	0.435297		1.73577e-07
							167.365	0.44047		1.13071e-09
							167.825	0.459253
20240424_18	00:02:00	2024-04-24	3025	9	5.48	71.8474	93.1693		0.437628		1.74607e-05
							93.6065	0.437202		1.58901e-09
							94.0323	0.425769		1.23357e-06
							94.8675
							95.275	0.407529		7.94672e-06
							95.6741	0.399091		1.30269e-05
							96.0713	0.397184		1.43481e-05
							96.4832	0.411885		5.813e-06
							96.9027	0.419508		2.88e-06
							97.3301	0.427402		9.17221e-07
							98.2306
							98.7057	0.475043		1.22799e-05
							99.181	0.475315		1.24591e-05
							99.6607	0.47967		1.55049e-05
							100.147	0.486749		2.11659e-05
							100.65	0.502538		3.69593e-05
							101.125	0.475043		1.22799e-05
							101.574	0.448908		1.1162e-06
							102.024	0.450542		1.46299e-06
							102.48	0.455986		2.95641e-06
							102.929	0.448637		1.06322e-06
							103.386	0.457347		3.411e-06
							103.834	0.447548		8.63281e-07
							104.286	0.452447		1.92644e-06
							105.124
							105.532	0.408618		7.38209e-06
							105.948	0.415833		4.16671e-06
							106.793
							107.203	0.409299		7.03956e-06
							107.608	0.40576		8.90829e-06
							108.021	0.412293		5.6302e-06
							115.579
							116.589
							117.073	0.483209		1.82251e-05
							117.537	0.464698		6.42812e-06
							118.005	0.468237		8.21872e-06
							118.473	0.467148		7.64433e-06
							118.953	0.480215		1.59095e-05
							119.432	0.479126		1.51063e-05
							119.916	0.484435		1.92187e-05
							120.421	0.504307		3.90012e-05
							120.929	0.508527		4.40941e-05
							121.436	0.506349		4.14266e-05
							121.926	0.490288		2.43256e-05
							122.411	0.485115		1.97812e-05
							122.889	0.478037		1.43238e-05
							123.385	0.496277		3.01732e-05
							123.88	0.494916		2.87891e-05
							124.374	0.494098		2.79728e-05
							124.903	0.528672		7.27112e-05
							125.445	0.54174		9.50824e-05
							125.97	0.52486		6.67499e-05
							126.438	0.467965		8.07331e-06
							126.912	0.474498		1.19248e-05
							127.396	0.483482		1.84441e-05
							127.872	0.476404		1.31895e-05
							128.335	0.463337		5.798e-06
							128.79	0.455169		2.69912e-06
							129.273	0.482121		1.73655e-05
							129.771	0.498182		3.21652e-05
							130.279	0.508527		4.40941e-05
							130.771	0.491649		2.55992e-05
							131.259	0.488382		2.25966e-05
							132.321
							132.724	0.402629		1.07448e-05
							133.155	0.431214		3.60828e-07
							133.563	0.407801		7.80374e-06
							133.963	0.40018		1.23011e-05
							134.365	0.402357		1.09124e-05
							134.756	0.390378		1.95836e-05
							135.495
							135.889	0.393646		1.69683e-05
							136.29	0.401268		1.15967e-05
							136.666	0.376223		3.30748e-05
							137.037	0.370234		3.98412e-05
							137.424	0.387112		2.23844e-05
							137.797	0.372956		3.66879e-05
							138.149	0.352811		6.3104e-05
							140.713
							141.267
							141.7	0.433391		1.57446e-07
							142.051	0.350361		6.68023e-05
							142.403	0.351995		6.43241e-05
							142.769	0.366422		4.44758e-05
							143.142	0.373501		3.60721e-05
							143.529	0.38684		2.26262e-05
							143.986	0.456258		3.04466e-06
							144.46	0.473954		1.15755e-05
							144.89	0.430669		4.24757e-07
							145.296	0.406168		8.68164e-06
							145.689	0.392829		1.76045e-05
							146.095	0.405896		8.83242e-06
							146.496	0.400452		1.2123e-05
							146.953	0.457075		3.31755e-06
							147.394	0.441831		1.54986e-07
							147.764	0.369417		4.08131e-05
							148.095	0.33076		0.000100181
							148.482	0.387657		2.19041e-05
							148.874	0.392012		1.82525e-05
							149.271	0.39664		1.47367e-05
							149.668	0.396913		1.45411e-05
							150.086	0.418146		3.32924e-06
							150.591	0.50526		4.0124e-05
							151.574
							152.017	0.443464		2.98802e-07
							152.45	0.433119		1.78312e-07
							152.912	0.461976		5.20039e-06
							153.335	0.423046		1.86512e-06
							153.753	0.41733		3.61397e-06
							154.187	0.434208		1.02577e-07
							154.675	0.488382		2.25966e-05
							155.103	0.427402		9.17221e-07
							155.539	0.436114		2.00967e-08
							155.979	0.440197		5.791e-08
							156.45	0.470959		9.74545e-06
							156.87	0.420324		2.62645e-06
							157.291	0.420597		2.54423e-06
							157.686	0.395279		1.57316e-05
							158.089	0.402901		1.05784e-05
							158.5	0.410796		6.31522e-06
							158.927	0.42713		9.66666e-07
							160.233
							160.646	0.412157		5.69081e-06
							161.06	0.414607		4.64867e-06
							161.485	0.424953		1.40917e-06
							161.887	0.402357		1.09124e-05
							162.253	0.365878		4.5158e-05
							162.978
							163.482
							165.017
20240415_7	00:08:30	2024-04-15	3023	5	5.17	58.769	33.6331		0.4594		1.63179e-05
							34.068	0.434935		8.55061e-06
							34.5059	0.437855		6.63132e-06
							34.9357	0.429827		1.24939e-05
							35.3945	0.458835		4.5624e-09
							35.8446	0.450078		1.25945e-06
							36.2784	0.43375		9.67543e-06
							36.7139	0.435574		8.3483e-06
							37.1678	0.45391		4.43257e-07
							37.7038	0.536007		8.63031e-05
							38.3106
							38.8085	0.497877		2.14561e-05
							39.2486	0.440044		5.42985e-06
							39.6804	0.431834		1.11749e-05
							40.1223	0.441868		4.52023e-06
							40.5718	0.449531		1.45373e-06
							41.0145	0.442689		4.16809e-06
							41.4437	0.429189		1.36226e-05
							41.8672	0.423579		1.91515e-05
							42.3078	0.440591		5.36035e-06
							42.7575	0.449656		1.43861e-06
							43.224	0.466555		7.7564e-07
							43.7884
							44.2557	0.467296		9.3052e-07
							44.6904	0.434776		9.04996e-06
							45.1508	0.460386		1.45067e-08
							45.5953	0.444422		3.34842e-06
							46.0423	0.447068		2.26987e-06
							46.4852	0.442872		4.0773e-06
							46.9242	0.43904		6.18709e-06
							47.362	0.437764		6.9869e-06
							47.7925	0.430465		1.26855e-05
							48.2339	0.441413		4.90207e-06
							48.6962	0.462301		1.27501e-07
							49.2316	0.53546		8.76531e-05
							49.7044	0.472791		2.7169e-06
							50.161	0.456555		1.24535e-07
							50.6171	0.456099		1.70272e-07
							51.0777	0.460659		2.47619e-08
							51.6065	0.52871		7.50603e-05
							52.0917	0.485197		1.03981e-05
							52.5493	0.45765		4.78585e-08
							53.0004	0.451081		1.08137e-06
							53.4379	0.43749		7.50084e-06
							53.8784	0.4405		5.58148e-06
							54.3212	0.44278		4.31607e-06
							54.7884	0.467227		9.57187e-07
							55.2819	0.493499		1.81677e-05
							55.7624	0.480545		6.98603e-06
							56.2818	0.519405		5.62591e-05
							56.8135	0.531629		8.28097e-05
							57.3203	0.506817		3.56883e-05
							57.6773	0.357034		0.000166331
							58.3865
							58.8883	0.50189		2.82092e-05
							60.7047
							61.1451	0.440409		5.54866e-06
							62.0247
							63.0436
							63.492	0.448437		1.79388e-06
							63.9013	0.409302		3.746e-05
							64.3348	0.433476		1.00308e-05
							64.7946	0.459839		2.87477e-09
							65.6388
							66.1584	0.519588		5.32732e-05
							66.6179	0.459564		3.94918e-10
							68.0853
							85.5495
							86.0599	0.510397		3.71526e-05
							86.5818	0.521959		5.6719e-05
							87.0836	0.5018		2.60543e-05
							87.5554	0.471788		2.22405e-06
							88.0317	0.476258		4.11867e-06
							88.4835	0.451812		8.34488e-07
							88.941	0.457558		4.91802e-08
							89.4024	0.461389		5.73278e-08
							89.8118	0.409394		3.62408e-05
							90.2484	0.436578		7.54854e-06
							90.7109	0.462483		1.37741e-07
							91.4917
							91.9487	0.457011		8.15418e-08
							92.4021	0.453362
20240415_7	00:08:30	2024-04-15	3023	5	3.34	60.737	33.8467		0.459126		1.36806e-05
							34.2758	0.429098		1.0364e-05
							34.6852	0.409394		2.87588e-05
							35.0842	0.398995		4.25379e-05
							35.6301
							36.2506
							36.6279	0.377285		7.78828e-05
							37.01	0.382119		6.89541e-05
							37.4137	0.403693		3.57302e-05
							37.8291	0.415369		2.22635e-05
							38.242	0.412952		2.4791e-05
							38.6465	0.404468		3.47381e-05
							39.2568
							39.7535	0.496782		1.62987e-05
							40.4922
							40.9496	0.457375		3.56446e-08
							41.3865	0.436897		5.7456e-06
							41.816	0.429508		1.02002e-05
							44.5451
							45.0093	0.464126		2.87375e-07
							45.4499	0.440591		3.94874e-06
							45.8868	0.436943		5.65607e-06
							46.3222	0.435391		6.4752e-06
							46.8109	0.488755		1.00907e-05
							47.3049	0.493955		1.39433e-05
							47.7561	0.451173		7.26984e-07
							48.208	0.451902		5.99814e-07
							48.6573	0.449348		1.09892e-06
							49.102	0.444697		2.393e-06
							49.5743	0.472244		1.978e-06
							50.1853
							50.7231	0.537831		7.20291e-05
							51.1975	0.474434		2.72488e-06
							51.6708	0.473248		2.31902e-06
							52.136	0.465243		4.35112e-07
							52.4427
							52.5835
							53.0298	0.446384		1.84494e-06
							53.454	0.424126		1.39203e-05
							53.8674	0.413453		2.37046e-05
							54.2828	0.415324		2.20529e-05
							54.6961	0.413316		2.41212e-05
							55.1196	0.423533		1.45615e-05
							55.572	0.45245		5.12262e-07
							56.0272	0.455186		1.80492e-07
							56.4541	0.426817		1.22807e-05
							56.8642	0.410124		2.82492e-05
							57.2758	0.411583		2.69086e-05
							57.6757	0.399908		4.225e-05
							58.6763
							59.1808	0.504445		2.47449e-05
							59.6812	0.500431		2.05556e-05
							60.17	0.488755		1.0577e-05
							60.6502	0.480181		5.3412e-06
							61.13	0.479815		5.22002e-06
							61.6556	0.525608		5.45664e-05
							62.1527	0.497148		1.7848e-05
							62.6322	0.479451		5.10015e-06
							63.1167	0.484559		7.98575e-06
							63.6018	0.485106		8.33295e-06
							64.1033	0.50148		2.21466e-05
							64.5981	0.494822		1.57311e-05
							65.0807	0.482552		6.85981e-06
							65.5576	0.476897		3.94768e-06
							66.0341	0.476463		3.75721e-06
							66.5114	0.47733		4.14239e-06
							67.0003	0.488937		1.11088e-05
							67.4951	0.494822		1.59277e-05
							69.4656
							69.9482	0.482553		6.7757e-06
							70.4455	0.497329		1.80183e-05
							70.9457	0.500158		2.07857e-05
							71.4267	0.481002		5.90823e-06
							71.8961	0.469416		1.30725e-06
							72.3671	0.471059		1.75803e-06
							72.8419	0.474707		2.99719e-06
							73.3598	0.517923		4.26803e-05
							73.8622	0.502461		2.31844e-05
							74.3311	0.468869		1.17197e-06
							74.7916	0.460477		2.25387e-08
							75.2698	0.478174		4.47941e-06
							75.7771	0.507364		2.87274e-05
							76.273	0.49587		1.66683e-05
							76.7457	0.472701		2.27512e-06
							77.2111	0.465403		4.86454e-07
							77.6811	0.469964		1.45019e-06
							78.1413	0.460203		1.43244e-08
							84.6507
							85.1322	0.481458		6.08202e-06
							85.602	0.469827		1.39652e-06
							86.0519	0.449941		1.0415e-06
							86.4997	0.447798		1.604e-06
							89.7793
							90.2032	0.423807		1.54003e-05
							90.6364	0.433293		8.23871e-06
							91.0714	0.434936		7.22405e-06
							91.938
							92.8013
							93.2386	0.437308		5.73516e-06
							93.6819	0.443327		3.00727e-06
							94.1433	0.46139		6.17642e-08
							94.5837	0.440408		4.22117e-06
20240415_7	00:08:30	2024-04-15	3023	5	4.12	46.7093	37.9123		0.458907		6.4396e-05
							38.8528
							44.4532
							44.8817	0.42855		4.18888e-05
							45.3054	0.423624		5.65863e-05
							45.7246	0.419246		7.49049e-05
							46.1721	0.447524		6.47875e-06
							46.6176	0.445517		8.96475e-06
							47.0446	0.426999		5.09064e-05
							47.4739	0.42928		4.38883e-05
							47.8792	0.405289		0.000143745
							48.291	0.411766		0.000111114
							49.7563
							63.0184
							63.546	0.527615		0.000214581
							64.0924	0.546406		0.000364574
							64.573	0.480545		2.22952e-05
							65.0676	0.494593		6.06421e-05
							65.5738	0.50627		0.000106821
							66.044	0.470146		6.31564e-06
							66.5074	0.463396		1.06054e-06
							66.9693	0.461937		4.83172e-07
							67.4296	0.460294		1.0686e-07
							67.8998	0.470238		7.5523e-06
							68.371	0.47115		8.81697e-06
							68.8573	0.486292		4.68708e-05
							69.3452	0.487934		5.266e-05
							69.8612	0.515939		0.00020329
							70.7558
							71.3608
							71.8337	0.472883		1.22079e-05
							72.2964	0.462666		8.83081e-07
							72.7386	0.442233		1.73766e-05
							73.1502	0.411584		0.000139967
							73.5654	0.415232		0.00011922
							73.9733	0.407934		0.000162391
							74.3711	0.397718		0.000234007
							74.7863	0.415232		0.000127168
							75.6124
							76.0772	0.464856		2.21183e-06
							76.5242	0.446976		8.89695e-06
							76.9723	0.448071		7.33882e-06
							77.9062
							78.6029
							79.0816	0.478721		2.18106e-05
							79.2546
							80.9174
							81.3745	0.457193		1.46908e-07
							83.2194
							83.6777	0.458288		1.8252e-08
							84.1582	0.480545		2.22952e-05
							84.6216	0.463396		9.59532e-07
20240415_7	00:08:30	2024-04-15	3023	5	2.38		64.351		0.45351		8.48784e-05
							64.949
							65.4312	0.482187		1.49527e-05
							65.8825	0.451355		8.43998e-08
							66.3269	0.444423		1.52898e-06
							66.7664	0.439496		3.70526e-06
							67.1993	0.432838		8.21754e-06
							67.6392	0.439952		3.60405e-06
							68.5363
							68.9738	0.43749		5.23725e-06
							69.4109	0.437124		5.4793e-06
							69.8469	0.436031		6.36456e-06
							70.3045	0.457558		3.48726e-07
							70.79	0.485471		2.22073e-05
							71.3087	0.518766		9.46313e-05
							71.7632	0.454457		2.04024e-08
							72.1848	0.421618		2.36528e-05
							72.6168	0.432016		1.09993e-05
							73.1298	0.51302		8.6378e-05
							73.6768	0.546976		0.0002184
							74.1405	0.463647		2.63509e-06
							74.583	0.442507		3.18567e-06
							75.0209	0.437945		6.54742e-06
							75.4659	0.44497		2.02565e-06
							75.9388	0.472883		1.07238e-05
							76.4328	0.494046		4.83296e-05
							76.9109	0.478083		1.82987e-05
							77.3718	0.460933		1.72212e-06
							77.8336	0.461754		2.19262e-06
							78.3035	0.469964		9.02499e-06
							78.7476	0.444057		3.08104e-06
							79.192	0.444423		2.94875e-06
							79.6451	0.453088		6.58093e-09
							80.1681	0.522963		0.00018553
							80.6432	0.475163		1.87549e-05
							81.1304	0.487113		4.70497e-05
							81.7454
							82.3215
							82.7969	0.475437		2.18552e-05
							83.2655	0.468596		1.03455e-05
							83.7156	0.450078		5.60732e-07
							84.1858	0.470146		1.38386e-05
							84.6001	0.414389		8.05482e-05
							85.0263	0.426201		4.14309e-05
							85.4794	0.453088		1.04521e-08
							85.931	0.451538		2.42932e-07
							86.3613	0.430374		3.56835e-05
							86.7721	0.410763		0.000130519
							87.1866	0.414502		0.000117045
							87.6216	0.435027		2.8467e-05
							88.0591	0.43749		2.33296e-05
							88.5185	0.459382		3.44859e-06
							88.9668	0.448254		3.06895e-06
							89.3944	0.427638		8.3667e-05
							89.8301	0.435665		4.54896e-05
							90.2079	0.377832		0.000954515
							90.6534	0.445517		1.27761e-05
							91.3794
							91.8755	0.496052		0.000603287
							92.2819	0.406384		0.000740272
							92.8206
							93.2953
							93.7197	0.424354		0.000850045
							94.2723
20240409_33	00:05:01	2024-04-09	3022	2	5.59		17.0832		0.500418
							19.8515				7.95859e-06
							21.3172
							22.5354
							23.7246
							24.9304
							26.0531
							27.1051
							28.1308
							29.1513
							30.2129
							31.2225
							32.2016
							33.2076
							34.1847
							35.1625
							36.11
							37.0663
							38.0241
							38.9729
							39.9036
[truncated: 3,159 more rows]
